1 **Phenotypic analysis of catastrophic childhood epilepsy genes: The Epilepsy**  
2 **Zebrafish Project**

3

4 Aliesha Griffin<sup>1\*</sup>, Colleen Carpenter<sup>1\*</sup>, Jing Liu<sup>1</sup>, Rosalia Paterno<sup>1</sup>, Brian Grone<sup>1</sup>, Kyla  
5 Hamling<sup>1</sup>, Maia Moog<sup>1</sup>, Matthew T. Dinday<sup>1</sup>, Francisco Figueroa<sup>1</sup>, Mana Anvar<sup>1, 2</sup>, Chinwendu  
6 Ononuju<sup>2</sup>, Tony Qu<sup>2</sup>, Scott C. Baraban<sup>1, 2</sup>

7

8 <sup>1</sup> Epilepsy Research Laboratory and Weill Institute for Neuroscience, Department of  
9 Neurological Surgery, University of California San Francisco, San Francisco, CA, 94143, USA

10

11 <sup>2</sup>Helen Wills Neuroscience Institute, University of California, Berkeley, CA 94720, USA

12

13 \* These authors contributed equally to this work.

14

15 Correspondence should be addressed to [scott.baraban@ucsf.edu](mailto:scott.baraban@ucsf.edu)

16

17

18

19 **Abstract**

20

21 Genetic engineering techniques have contributed to the now widespread use of zebrafish to  
22 investigate gene function, but zebrafish-based human disease studies, and particularly for  
23 neurological disorders, are limited. Here we used CRISPR-Cas9 to generate 40 single-gene  
24 mutant zebrafish lines representing catastrophic childhood epilepsies. We evaluated larval  
25 phenotypes using electrophysiological, behavioral, neuro-anatomical, survival and  
26 pharmacological assays. Phenotypes with unprovoked electrographic seizure activity (i.e.,  
27 epilepsy) were identified in zebrafish lines for 8 genes; *ARX*, *EEF1A*, *GABRB3*, *GRIN1*, *PNPO*,  
28 *SCN1A*, *STRADA* and *STXBPI*. A unifying epilepsy classification scheme was developed based  
29 on local field potential recordings and blinded scoring from ~3300 larvae. We also created an  
30 open-source database containing sequencing information, survival curves, behavioral profiles  
31 and representative electrophysiology data. We offer all zebrafish lines as a resource to the  
32 neuroscience community and envision them as a starting point for further functional analysis  
33 and/or identification of new therapies.

34

35

36

## 37 **Introduction**

38

39 Catastrophic childhood epilepsies are characterized by intractable persistent seizures and are  
40 frequently associated with developmental delay, cognitive dysfunction and autism<sup>1-3</sup>. Many are  
41 rare genetic disorders lacking effective therapeutic options<sup>4-6</sup>. With technological advances and  
42 large-scale patient cohorts, genome-wide analyses have now identified *de novo* mutation in a  
43 single gene for most of these epilepsies<sup>7-11</sup>. These studies highlight the complexity of epilepsy, as  
44 mutations in genes coding for ion channels, ligand-gated receptors, solute transporters, metabolic  
45 enzymes, synaptic trafficking proteins, kinases, transcription factors, and adhesion molecules  
46 were identified. Unfortunately, our overall understanding of genetic epilepsies is severely limited  
47 as few experimental animal models exist, and human induced pluripotent stem cell derived two-  
48 or three-dimensional neuronal models fail to fully recapitulate the complex brain network seen in  
49 patients. Zebrafish, a small vertebrate with considerable genetic similarity to humans<sup>12</sup>, offer an  
50 attractive alternative model to study these genetic mutations *in vivo*. Analysis of zebrafish  
51 mutants for human genes has provided valuable insight into complex circuits controlling  
52 behavior<sup>13-17</sup>, evolutionarily conserved developmental programs<sup>18-20</sup> and drug candidates for a  
53 variety of diseases, including epilepsy<sup>21-29</sup>.

54

55 Epilepsy classification, incorporating an understanding of different seizure types and  
56 comorbidities, is an essential clinical resource in evaluating patients and selection of anti-seizure  
57 treatments<sup>30-33</sup>. Clinical classification resources have evolved continuously since the 1960s.  
58 However, adaptation of this classification strategy to animal models<sup>34</sup>, specifically zebrafish  
59 models developed for catastrophic epilepsies of childhood, is lacking. Because clinical seizure  
60 classifications promoted by the International League Against Epilepsy (ILAE)<sup>33</sup> are defined by  
61 the presence of unprovoked “self-sustained paroxysmal disorders of brain function”, we focused  
62 our phenotyping effort on developing a standardized seizure classification scheme using  
63 electrophysiology data. Such a resource, broadly adapted, could be particularly useful for  
64 preclinical studies designed to characterize epilepsy phenotypes in any larval zebrafish model.

65

66 To better understand mechanisms underlying human genetic epilepsies, it is important to first  
67 identify clinically relevant phenotypes in an experimental model system<sup>35</sup>. Although efficient

68 gene inactivation in mice has contributed many pediatric epilepsy models<sup>36-38</sup>, to generate dozens  
69 of mutant mouse lines followed by a systematic phenotypic analysis would require several  
70 decades of research. Using an efficient CRISPR-based gene editing strategy<sup>39,40</sup> we successfully  
71 generated 37 stable zebrafish lines representing human monogenic pediatric epilepsies. Large-  
72 scale phenotypic analysis of survival, behavior and electrographic brain activity was performed.  
73 We established read-outs to identify seizures at electrographic and behavioral levels, and an  
74 open-source online website to efficiently share data with the neuroscience community. As many  
75 of these zebrafish represent rare genetic diseases for which our understanding of  
76 pathophysiology remains largely unknown, they provide a rich resource to further investigate  
77 key etiological questions or utilization in high-throughput precision medicine-based therapy  
78 development.

79

## 80 **Results**

81

### 82 **Generation of loss-of-function models for human epilepsy genes**

83 We evaluated genes identified in a genome-wide association study from 264 patients with  
84 epileptic encephalopathies by the world-wide Epilepsy Genetics Initiative, Epi4K  
85 Consortium<sup>8,41</sup>. First, analysis of human genetic data was performed to identify genes where a  
86 loss-of-function (LOF) mutation was likely a causal mechanism of the epileptic phenotype. This  
87 limited our initial Epilepsy Zebrafish Project (EZP) choices to 63 gene candidates  
88 (Supplementary Table 1). Second, Epilepsy Genetics Initiative identified human genes were  
89 selected representing 57 orthologous zebrafish genes (Figure 1a). From this group, we identified  
90 48 zebrafish genes that were high confidence orthologs (Figure 1b, homology scores;  
91 Supplementary Table 2) and examined expression data patterns with a primary focus on brain  
92 expression (Figure 1c). Third, RT-PCR confirmed gene expression for 46 zebrafish orthologs  
93 from the 4-cell to 7 dpf stage (Figure 1e) e.g., an early neurodevelopmental window wherein  
94 high-throughput studies would be feasible. To generate stable mutant lines, we used Cas9 with  
95 single *in vitro* transcribed guide RNA (with no predicted off-target sites) targeted towards the  
96 start of the protein coding sequence. A total of 46 zebrafish orthologous genes were targeted  
97 (Supplementary Table 3). This group includes a previously published *stxbp1b* mutant<sup>42</sup> and a  
98 novel *scn1lab* CRISPR mutant. Adult founders harboring predicted protein coding deletions

99 (Figure 1e; <https://zebrafishproject.ucsf.edu>) were confirmed and outcrossed for at least two  
100 generations. All EZP zebrafish were maintained as outcrossed lines with phenotypic  
101 assessment(s) performed on larvae generated from a heterozygous in-cross. For seven genes we  
102 could not obtain a viable line (*grin2aa*, *syngap1a*, *tbc1d24*, *prick11a*, *plcb1*, *gosr2* and *stx1b*). In  
103 total, 37 novel EZP zebrafish lines were subjected to phenotypic screening described below.

104

### 105 **Classification of seizure activity in larval zebrafish**

106 We previously described minimally invasive local field potential recording (LFP) techniques to  
107 monitor brain activity in larval zebrafish<sup>43</sup> (Supplementary Figure 1). To identify epilepsy  
108 phenotypes in CRISPR-generated zebrafish lines, we obtained LFP recordings from 3255 larvae  
109 at 5 and 6 days post fertilization (dpf). We blindly recorded a minimum of 75 larvae per line,  
110 from at least three independent clutches. Larvae were randomly selected and genotyped *post hoc*  
111 to evaluate homozygote, heterozygote and wild-type (WT) phenotype-genotype correlations.  
112 Although long-duration, multi-spike large amplitude discharges are commonly described as  
113 seizure events in larval zebrafish models<sup>23,44-47</sup>, a unified seizure classification system does not  
114 exist. As seizure classification is an essential clinical tool in identification of an epilepsy  
115 phenotype<sup>48</sup>, we sought to establish the first classification scheme that could be universally  
116 applied to all zebrafish epilepsy models. An LFP electrophysiology-based scoring system  
117 covering all types of observed activity was established: (i) **Type 0**: the range of low voltage  
118 activities and patterns of small membrane fluctuations; (ii) **Type I**: low amplitude *interictal-like*  
119 sharp waveforms, with voltage deflections at least three times above baseline (duration range: 10  
120 - 99 msec); and (iii) **Type II**: large amplitude *ictal-like* multi-spike waveforms, with voltage  
121 deflections at least five times above baseline (duration range: 45 - 5090 msec), often followed by  
122 a transient period of electrical suppression with no detectable events (Figure 2a). Based on this  
123 numeric classification, each 15 min recording epoch was assigned an LFP score by two  
124 independent investigators; cumulative averages can be seen in the heatmap for all 37 EZP-  
125 generated zebrafish lines (Figure 2b). We classified mutants with an average LFP score of 1.0 or  
126 above as an epilepsy phenotype. These included two genes previously determined to exhibit  
127 epilepsy phenotypes in zebrafish (e.g., *scn1lab*<sup>23</sup> and *stxbp1b* homozygotes<sup>42</sup>) and six novel  
128 zebrafish epilepsy lines (e.g., *arxa*, *eef1a2*, *gabrb3*, *pnp0*, *strada* homozygotes and *grin1b*  
129 heterozygotes). The percentage of EZP mutant larvae scored at Type II ranged from 29 to 83%

130 for epilepsy lines and a significant correlation between LFP classification scores versus  
131 percentage of Type II mutants was noted (Figure 2c;  $R^2 = 0.8790$ ). Distribution of LFP  
132 classification scores for all WT larvae skewed toward Type 0 (mean WT score = 0.66;  $n = 781$ )  
133 and was significantly different than scoring distributions for mutant lines designated as epileptic  
134 (mean EZP-epilepsy score = 1.23;  $n = 190$ ; Unpaired t-test  $p < 0.0001$ ,  $t = 10.26$ ,  $df =$   
135  $969$ )(Figure 2d). The majority of LFP recordings from all lines were classified as Type 0 or 1  
136 (79%;  $n = 3255$ ; Figure 2e).

137  
138 We next examined the frequencies, durations and spectral features of spontaneous epileptiform  
139 events recorded in all 8 EZP-epilepsy lines. To provide an unbiased quantitative analysis, Type I  
140 interictal- and Type II ictal-like electrical events were detected using custom software (see  
141 Methods; Figure 3) on homozygote and WT sibling larvae recordings. Representative LFP  
142 recordings (Figure 4b, top) with accompanying time-frequency spectrograms (Figure 4b, bottom)  
143 are shown for each EZP epilepsy line; individual LFP scoring distribution plots for mutants and  
144 WT siblings are shown at left. No difference in interictal-like (Type I) event frequency or  
145 duration was noted (Figure 4c). Ictal (Type II) events were more frequent and longer in duration  
146 for *scn11ab* mutant compared to WT; ictal event duration was shorter for *stxbp1b* mutants  
147 compared to WT (Figure 4d). Ictal event histograms showed similar overall distributions at a  
148 cumulative and individual level (Figure 5; Supplementary Figure 2). However, large-amplitude  
149 multi-spike ictal events when present in WT siblings were usually brief in duration, rarely  
150 exceeding 2.0 sec (Figures 5a, 5c) and less frequently encountered (Figures 5b, 5c) than those  
151 identified in EZP-epilepsy lines (also see cumulative distribution insets in Supplementary Figure  
152 2a). Representative raw LFP traces and classification distribution plots for all 37 zebrafish lines  
153 can be explored on our open-source website, <https://zebrafishproject.ucsf.edu>, where users can  
154 also find information on homology, sequencing, survival and genotyping protocols.

155

### 156 **EZP lines for understanding disease pathophysiology**

157 Epileptic zebrafish can be used to study underlying neurobiological mechanisms, behavioral  
158 comorbidities and drug discovery. Many pediatric epilepsies are associated with increased  
159 mortality rates and thus, survival studies were performed on all EZP lines to evaluate larval  
160 health, confirm Mendelian genotyping ratios, and identify early death phenotypes (Figure 6a,

161 Supplementary Figure 3). Early fatality was noted in *aldh7a1*, *depdc5*, *scn8aa* and *strada*  
162 homozygous mutants that only survive between 8-10 dpf (Figure 6b).

163

164 We further performed a series of pilot experiments in all 8 EZP-epileptic lines to investigate  
165 other known pathophysiology. Epilepsy often manifests as convulsive behaviors in many of  
166 these genetic epilepsies. Prior work from our laboratory using chemically induced  
167 (Pentylentetrazole ; PTZ) or an ENU-mutagenesis mutant for Dravet syndrome (*scn1lab*<sup>s552/s552</sup>)  
168 describe a characteristic series of larval seizure-like behaviors, culminating in bursts of high-  
169 speed swim activity and whole-body convulsions<sup>23,44</sup>. Using these well-established models, we  
170 first developed a custom MATLAB algorithm to detect high-speed ( $\geq 28$  mm/s), long-duration ( $\geq$   
171 1 s) behavioral events corresponding to these convulsive behaviors in freely behaving larvae  
172 (Figure 7). The MATLAB-detected behavioral event duration was similar to that measured for  
173 Type II ictal-like events in LFP recordings (see Figure 5). As expected, the EZP generated  
174 *scn1lab* mutant larvae displayed significantly higher velocity movements and higher frequencies  
175 of convulsive-like events compared to WT sibling controls; similar results were obtained with  
176 *scn1lab*<sup>s552/s552</sup> larvae. There was no difference in the total distance traveled between WT and  
177 homozygous mutants in these lines (Figure 6c). Maximum velocity and total distance  
178 measurements show that *arxa* larvae are hypoactive and they had no detectable high-speed, long-  
179 duration events during these 15 min recording epochs (Figure 6c; Figure 6d, representative  
180 traces). We observed that the duration of high speed events in *scn1lab*<sup>s552/s552</sup> larvae were  
181 significantly longer than in WT sibling controls (Figure 6e). No significant behavioral  
182 phenotypes were seen in the other epileptic lines (Supplementary Figure 4).

183

184 ARX-related epilepsies are categorized as “interneuronopathies”<sup>49</sup> and *Arx* mutant mice exhibit a  
185 reduced number of interneurons in both neocortex and hippocampus<sup>50,51</sup>. Using volumetric light-  
186 sheet microscopy imaging in larval *arxa* mutants co-expressing a green fluorescent protein  
187 (GFP) in *Dlx*-labeled interneurons<sup>52</sup>, we confirmed a significant reduction in interneuron density  
188 for homozygous *arxa* mutant larvae compared to WT sibling controls (Figure 8a). *EEF1A2*  
189 mutations are associated with neurodevelopmental deficits in some patients.<sup>53</sup> Using  
190 conventional morphological analyses measuring overall head length, midbrain/forebrain width

191 and body length on *in vivo* images from *eefla2* mutant larvae and WT siblings at 5 dpf, we noted  
192 no differences (Figure 8b).

193

194 Patients with *GABRB3* mutations, like many of the genes studied here, are often classified as  
195 pharmaco-resistant<sup>54</sup>. Using a 1 hr LFP recording protocol, we evaluated electrographic seizure  
196 activity in *gabbr3* mutants treated with standard antiepileptic drugs (AEDs): carbamazepine,  
197 valproate and topiramate. In these zebrafish mutants, carbamazepine suppressed high-frequency  
198 interictal-like and long duration multi-spike ictal-like epileptiform discharges (Figure 8c).  
199 Patients with *ALDH7A1* mutations are associated with pyridoxine-dependent encephalopathy.  
200 Using a CRISPR-generated *aldh7a1*<sup>ot100</sup> mutant, Pena et al. reported hyperactive behavior and  
201 spontaneous electrographic seizures in fed larvae starting at 10 dpf; 10 mM pyridoxine treatment  
202 rescued these phenotypes<sup>46</sup>. The unperturbed EYP generated *aldh7a1* mutant larvae die  
203 prematurely between 7 and 9 dpf. Daily 10 mM pyridoxine effectively extended the median  
204 survival of *aldh7a1* mutant larvae to that observed in heterozygote and WT sibling controls  
205 (Figure 8d).

206

## 207 **Discussion**

208 Progress in exploring pathogenesis, and developing new therapies, for monogenic epilepsies is  
209 complicated by limited availability of preclinical animal models for many of these genes. The  
210 emergence of zebrafish as a vertebrate model system amenable to genetic manipulation holds  
211 much promise toward accelerating progress in understanding these rare epilepsies. Here we  
212 utilized CRISPR/Cas9 and a battery of larval zebrafish assays to systematically evaluate 40  
213 different single gene mutations identified in this population. We determined that homozygous  
214 deletion of *arxa*, *eefla2*, *gabbr3*, *pnpa*, *scn1lab*, *strada* and *stxbp1b* or heterozygous loss of  
215 *grin1b* result in recurrent unprovoked electrographic seizures (i.e., epilepsy). In addition, we  
216 developed an electrophysiology-based classification system that can be used to identify seizures  
217 in any larval zebrafish model. Finally, we show that clinically relevant phenotypes such as  
218 interneuron loss (*arxa*) or pharmaco-resistance (*gabbr3*) can be recapitulated in zebrafish  
219 models.

220



221 Although, CRISPR/Cas9 works with remarkable efficiency to disrupt gene function in  
222 zebrafish<sup>39,40</sup>, recent large-scale efforts have not reported on epilepsy or clinically-relevant  
223 functional outcome measures<sup>16,17</sup>. To present robust and well-controlled functional assays, we  
224 outcrossed all EZP lines a minimum of three generations and blindly analyzed homozygous,  
225 heterozygous and WT siblings. This approach avoids off-target or toxicity effects from  
226 microinjection or CRISPR/Cas9 editing that might cause identification of false positives. A  
227 limitation typical of these types of CRISPR-based larval zebrafish studies, focused primarily on  
228 novel genes, is that the full spectrum of tools (antibodies, etc.) or functional assays (single-cell  
229 electrophysiology) necessary to confirm LOF mutation are not available. Nonetheless, epileptic  
230 activities seen in CRISPR/Cas9 deficient (*aldh7a1*)<sup>46,55</sup> or ENU-generated (*scn1lab*<sup>s552/s552</sup>)<sup>23</sup>  
231 zebrafish were successfully recapitulated here. Interestingly, but perhaps not surprisingly, the  
232 majority of our CRISPR-generated single gene LOF zebrafish mutants were not associated with  
233 epilepsy phenotypes at this stage of larval development (5-6 dpf). It is possible that many of  
234 these single gene mutations are one factor in the emergence of epilepsy in humans, but full  
235 clinical phenotypes rely upon polygenic factors<sup>56,57</sup>, epigenetics<sup>53</sup> or environmental issues such  
236 as early-life febrile seizures<sup>58</sup>. Developmental considerations are an additional confounding  
237 factor<sup>2,3</sup>, as clear epileptic phenotypes may emerge at later juvenile or adult timepoints. Although  
238 a potential limitation for interpretation of these studies, we chose to focus this initial phenotypic  
239 screening effort on larval developmental ages that would lend themselves to future high-  
240 throughput drug discovery. Where single gene mutant mice are available for electrophysiology  
241 comparisons a similar lack of unprovoked seizure phenotypes have been reported e.g., *Cdkl5*<sup>59,60</sup>,  
242 *Chd2*<sup>61</sup> or *Depdc5*<sup>62</sup>. Further, the frequency and severity of seizure activity in patients with  
243 single gene mutations can also be variable e.g., *SCN8A*<sup>63</sup>, *PCDH19*<sup>64</sup>, *MEF2C*<sup>65</sup>, *CDKL5* and  
244 *ARX*<sup>66</sup>, which highlights the complexity of modelling rare epilepsy gene candidates.

245  
246 Our previous studies established the presence of hyperactive and seizure-like (stage III)  
247 behaviors in PTZ-treated WT larvae and spontaneously in *scn1lab*<sup>s552/s552</sup> mutant larvae, a model  
248 of Dravet syndrome<sup>23,44</sup>. These stage III behaviors are defined as brief clonus-like convulsions  
249 followed by a loss of posture, where a larvae falls on its side and remains immobile for 1–3 s  
250 (manually scored)<sup>44</sup>. Behavioral readouts were instrumental in primary screens aimed at finding  
251 novel anti-epileptic drugs that treat Dravet syndrome, ultimately allowing us to test over 3500

252 drugs in less than 5 years<sup>23,24,27</sup> and advancing our lead candidate to clinical trials  
253 (<https://clinicaltrials.gov/ct2/show/NCT04462770>). Here, we further refine our definition of  
254 seizure-like movements as events  $\geq 28$  mm/s in velocity and  $\geq 1$  s in duration and created a  
255 MATLAB algorithm to efficiently detect these events in our behavioral assays; total distance  
256 moved was not a reliable measure of these events. Interestingly, of our 8 EZP-epilepsy CRISPR  
257 lines, only the most robust phenotypic line (*scn1lab* mutants) had significantly more seizure-like  
258 behavioral events compared to controls, suggesting that hyper-locomotion alone may not be  
259 sufficient to identify epileptic phenotypes. Interestingly, hypo-locomotion seen here in *arxa*  
260 mutant larvae [also reported in *tsc2*<sup>67</sup> and *gabrg2*<sup>68</sup> mutants, respectively] may represent a  
261 pathological behavioral state. Ultimately and mimicking clinical diagnoses of epilepsies using  
262 video-electroencephalographic monitoring<sup>2,30,44</sup>, our electrophysiology-based screening approach  
263 successfully identified epileptic activity that was not easily detected in locomotion-based assays.  
264 Although simple locomotor readouts have grown popular as seizure assays<sup>69-74</sup>, this study  
265 emphasizes the rigor necessary to accurately identify epileptic phenotypes in zebrafish and  
266 suggests that sole reliance on behavior may lead to misleading conclusions during phenotyping  
267 and/or drug discovery efforts.

268

269 Overall, the Epilepsy Zebrafish Project demonstrates the power of large-scale phenotype-based  
270 analyses of human gene mutations and all mutant lines are available to the scientific community  
271 (<https://zebrafishproject.ucsf.edu>). These CRISPR-generated zebrafish models have two  
272 important advantages: first, they provide a valuable *in vivo* model system to explore underlying  
273 pathophysiological mechanisms in rare genetic epilepsies. Second, they provide an easily  
274 accessible preclinical model system for high-throughput drug discovery and therapy  
275 development that is far more efficient than rodent models. Pilot neurodevelopmental and  
276 pharmacological data was provided for several epileptic zebrafish lines here as a potential  
277 starting point for further investigations. We anticipate, and hope, that future studies using these  
278 zebrafish will help us to better understand genetic disorders and further the ultimate vision of  
279 precision medicine.

280

281 **Figure Legends**

282

283 **Figure 1| The Epilepsy Zebrafish Project (EZP).** (a) Overview of the zebrafish epilepsy  
284 disease model discovery workflow from human genome wide association studies (GWAS) to  
285 generation of zebrafish models and phenotypic characterization. (b) Tissue expression profiles of  
286 EZP zebrafish target genes. Heatmap represents the maximum number of sequence reads for  
287 each gene per tissue. (c) Developmental gene expression profiles for EZP lines. (d)  
288 Representative frame-shift mutant lines confirmed for *depdc5* and *eef1a2*.

289

290 **Figure 2| Seizure classification using electrophysiological recording identifies epileptic**  
291 **zebrafish lines.** (a) LFP recordings representing Type 0 (low voltage, small or no membrane  
292 fluctuations), Type I (low amplitude, sharp *interictal-like* waveforms) and Type II (low  
293 frequency, sharp *ictal-like* waveforms with large-amplitude multi-spike events and post-ictal  
294 slowing) scoring activity. For each example a color-coded event rate histogram (top), full 15 min  
295 LFP recording (middle), and high-resolution LFP close-up (red box, red trace at bottom) are  
296 shown. (b) Heatmap showing mean larval zebrafish LFP recording scores for all 37 EZP  
297 zebrafish lines ranked from highest homozygote score to lowest; N = 77 to 127 larvae per gene  
298 (see <https://zebrafishproject.ucsf.edu> for N values on each individual line). A threshold of a  
299 mean LFP score > 1.0 was classified as a an EZP line exhibiting epilepsy (indicated in bold font:  
300 *scn1lab*, *arxa*, *strada*, *stxbp1b*, *pnpo*, *gabrb3*, *eef1a2* and *grin1b*). (c) Regression plot for all 37  
301 mutants showing mean LFP score versus % of Type II larvae for each homozygote. 7  
302 homozygote and 1 heterozygote lines highlighted in “EZP-epi” box as clearly differentiated from  
303 cluster of 31 non-epileptic EZP lines with LFP scores < 1.0. Simple linear regression  $R^2 =$   
304 0.8790; \*\*\*Significant deviation from zero,  $p < 0.0001$ ; DF<sub>n</sub>, DF<sub>d</sub> = 1, 36. (d) Violin plots of all  
305 LFP scores recorded for EZP-epilepsy lines (N = 190) compared to all WT control siblings (N =  
306 783). Note: Type 2 epileptiform events were only observed in 14.7% of all WT larvae. (e)  
307 Distribution of Type 0, I and II scores for all WT, heterozygote and homozygote larvae screened  
308 by LFP recordings (N = 3255).

309

310 **Figure 3| Automated interictal-like event quantification** (a) A representative LFP recording  
311 with interictal-like events. A voltage threshold (0.15 – 0.25 mV, depending on the noise level)  
312 was set for event detection. Data was binarized by threshold: super-threshold data points were  
313 scored as 1, and under-threshold data points were scored as 0. (b) A data binning method was

314 used for automated quantification of interictal-like events: 0.01 sec binning in 0.5 sec time  
315 window. In each window, value of the first bin was calculated, which is the ratio of active data  
316 points to the number of total data points within the window. (c) Color raster plots were created  
317 according to the raster score. A raster score threshold (0.2 – 0.4) was set to define the start and  
318 end of an event. (d) Comparison between interictal-like event durations measured automatically  
319 and manually. A 10 sec representative epoch from each recording will be used as a testing  
320 sample to optimize the algorithm. Voltage and raster score thresholds were chosen when the  
321 difference between automated and manual results is less than 3% of manual measurements.

322

323

324 **Figure 4| Electrographic seizure activity in epileptic zebrafish mutant lines.** (a) Schematic of  
325 recording configuration and protocol for electrophysiology-based screening of larval zebrafish.  
326 (b) Representative raw LFP recording traces (top, right) along with a corresponding wavelet  
327 time-frequency spectrogram (bottom, right) and LFP scoring distribution plot for WT and mutant  
328 larvae (left) are shown for each EYP-epilepsy line. Type 0, I and II scoring as in Figure 2. A  
329 representative WT LFP recording with the corresponding wavelet time-frequency spectrogram is  
330 shown in Supplementary Figure 5. Scale bar = 500  $\mu$ V. Representative LFP recordings and  
331 distribution plots for all 37 lines can be found online (<https://zebrafishproject.ucsf.edu>). (c)  
332 Cumulative plots of interictal event frequency (left) and duration (right) for all EYP-epilepsy  
333 lines compared to WT sibling controls. Each point represents mean of all interictal events in a  
334 single 15 min larval LFP recording detected using custom software in MATLAB (N = 9775,  
335 WT; N = 6750, *scn1lab*; N = 2550, *arxa*; N = 5790, *strada*; N = 6750, *stxbp1b*; N = 3538,  
336 *pnp0*; N = 3455, *gabrb3*; N = 4335, *efl1a2*; N = 6610, *grin1b\**). (d) Cumulative plots of ictal  
337 event frequency (left) and duration (right). Each point represents all ictal events in a single 15  
338 min larval LFP recording detected using custom software in MATLAB (N = 56, WT; N = 62,  
339 *scn1lab*; N = 26, *arxa*; N = 26, *strada*; N = 48, *stxbp1b*; N = 22, *pnp0*; N = 59, *gabrb3*; N = 27,  
340 *efl1a2*; N = 55, *grin1b\**). \*for *grin1b* designates heterozygote. \*\* $p < 0.01$ , ANOVA with  
341 Dunnett's multiple comparisons test.

342

343 **Figure 5| Distribution of ictal events.** Histograms depict number and duration of ictal events  
344 measured using a custom MATLAB-based program for (a) all sibling wild-type (WT) larvae

345 from EZP epilepsy lines and **(b)** same for epileptic zebrafish lines (EZP)-Epi. Box-and-whisker  
346 plots showing the distribution of ictal event durations; mean and minimum/maximum values are  
347 shown (*insets*). **(c)** Estimation plot showing that ictal event duration for WT ( $1.134 \pm 0.075$  sec;  
348  $N = 56$ ) is shorter than for Epi-EZP ( $1.353 \pm 0.043$  sec;  $N = 299$ ); Non-parametric t-test  $*p =$   
349  $0.0352$ ,  $t = 2.115$ ,  $df = 353$ ). Each dot on the top plot represents the duration (measured in msec)  
350 for one individual ictal event.; each dot in the bottom plot represents ictal event frequency for  
351 one LFP recording. LFP recording epochs were 15 min.

352  
353 **Figure 6| Survival and behavioral phenotypes.** **(a)** Heatmap displaying median wild-type  
354 (WT), heterozygote (HET) and homozygote mutant (MUT) larval survival for EZP lines. Range  
355 extends from 8 dpf (red) to 13 dpf (blue). Asterisks indicate MUTs with significant survival  
356 deficits compared WT control siblings;  $p < 0.05$ , log rank test. **(b)** Lines with significant survival  
357 deficits. **(c)** Quantification of the basal locomotor activity of epileptic lines after 1 hr habituation  
358 in DanioVision chamber. Maximum velocity and total distance traveled were extracted directly  
359 from EthoVision XT 11.5 software while the number of events  $\geq 28$  mm/s, termed high speed  
360 events (HSE), and long duration HSE ( $\geq 1$  s) were scored using a MATLAB algorithm  
361 (*scn1lab*<sup>552</sup> WT  $N = 19$ , MUT  $N = 31$ ; *scn1lab* WT  $N = 21$ , MUT  $N = 16$ ; *arxa* WT  $N = 25$ ,  
362 MUT  $N = 22$ ; *strada* WT  $N = 27$ , MUT  $N = 31$ ; *stxbp1b* WT  $N = 26$ , MUT  $N = 43$ ; *pnpo* WT  $N$   
363  $= 42$ , MUT  $N=40$ ; *gabrb3* WT  $N = 35$ , MUT  $N = 36$ ; *ee1a2* WT  $N = 30$ , MUT  $N = 27$  and  
364 *grin1b* WT  $N=29$  and HET=57). **(d)** Representative traces of *arxa* WT and MUT movement. **(d)**  
365 Comparison of duration of HSE in *scn1lab* ENU and CRISPR larvae. Displayed as mean  $\pm$  SEM,  
366 One-Way ANOVA was used to determine the significance of both HET and MUT behavior for  
367 all lines (See Supplementary Figure 4 for expanded data set). *Post hoc* Dunnett multiple  
368 comparison test,  $*p \leq 0.05$ ,  $**p \leq 0.005$ ,  $***p < 0.0001$ .

369  
370 **Figure 7| Automated detection of behavioral seizure-like events.** **(a)** Example of low-speed  
371 movement in a WT larva (left - green), high-speed movement in the same WT larva (middle -  
372 orange), and seizure-like movement in a PTZ-treated larva (right - red). Top traces represent the  
373 larvae track during 15 min recording in a 96-well plate. The bottom panels show speed values  
374 across time for the events highlighted. Note the short and long duration in the high-speed events  
375 in WT and PTZ-treated larvae, respectively. **(b).** Distribution of maximum speed (left) and

376 duration (right) across all movements in WT larvae (n: 109) during the 15-minute recording  
377 session. The average maximum speed was 10.5 mm/sec and the duration of the events was less  
378 than 1 second. (c). Frequency of seizure-like movements (defined as events with maximum  
379 speed greater than 28 mm/sec and duration greater than 1 second) in control and PTZ-treated  
380 larvae at different concentrations after 10, 30 and 60 minutes (two-way ANOVA  $p < 0.05$ ). Note  
381 the increased number of events with increasing PTZ dose and the lower number when using 15  
382 mM after 60 minutes due to increased larvae mortality.

383  
384 **Figure 8| Developmental and pharmacological characterization.** (a) Representative images of  
385 *dlx*-GFP expressing interneurons in *arxa* MUT larvae (N = 8) and WT siblings (N = 12) obtained  
386 from volumetric light sheet imaging microscopy. Unpaired two-tailed t-test  $*p = 0.0268$ ;  $t =$   
387 2.411,  $df = 18$  (b) High resolution images of larvae were taken using a SteREO Discovery.V8  
388 microscope (Zeiss) and overall head length, midbrain width, forebrain width and body length  
389 were quantified in *eef1a2* MUT (N=6) and WT (N=5) larvae. (c) Representative 1 hr LFP traces  
390 from *gabrb3* MUT larvae exposed to AEDs. The first ~10 min of the recording (in red)  
391 represents baseline. Drugs were bath applied at a concentration of 0.5 mM; N = 3-6 fish per drug.  
392 Results from carbamazepine treatment shown as violin plot. Unpaired two-tailed t-test  $**p <$   
393 0.0001;  $t = 6.344$ ,  $df = 10$ . (d) Kaplan-Meier survival curves for *aldh7a1* WT, *aldh7a1* HET and  
394 *aldh7a1* MUT larvae treatment with 10 mM pyridoxine (pyr) or vehicle for 30 mins daily starting  
395 at 4 dpf. Median survival for vehicle treated *aldh7a1* WT = 12 dpf (N = 12), *aldh7a1* HET =  
396 11.5 dpf (N = 22) and *aldh7a1* MUT = 8 dpf (N = 9). Median survival for 10 mM pyridoxine  
397 (pyr) treated larvae for *aldh7a1* WT = 12 dpf (N = 21), *aldh7a1* HET = 12 dpf (N = 34) and  
398 *aldh7a1* MUT = 12 dpf (N = 13).

399  
400 **Supplementary Figure 1| Local field potential recordings are minimally invasive.** (a) Five  
401 dpf larvae were left freely swimming in embryo medium or subjected to agar embedding or agar  
402 embedding with electrode implantation, and behavior was tracked 4 hr and 24 hr after each  
403 treatment. Results show no significant differences in the total distance traveled (b) or maximum  
404 velocity (data not shown) of larvae when compared across the treatment groups. Data displayed  
405 as mean  $\pm$  SEM.

406

407 **Supplementary Figure 2| Distribution of ictal events.** Histograms depict number and duration  
408 of ictal events cumulatively (**a-b**) and across individual EYP-epilepsy lines (**c-j**). Asterisk for  
409 *grin1b* designates heterozygote. Interictal events were measured using a custom MATLAB-  
410 based program for EYP-epilepsy lines and WT siblings.

411

412 **Supplementary Figure 3| Kaplan-Meier survival curves for zebrafish CRISPR lines.** Plots  
413 of survival for unfed WT, heterozygous and homozygous larvae across all zebrafish lines.

414

415 **Supplementary Figure 4| Basal locomotor activity of epileptic zebrafish lines.** Five dpf larval  
416 zebrafish were tracked in the behavioral assay and graphs depict (**a**) total distance traveled, (**b**)  
417 maximum velocity, (**c**) number of high-speed events (HSE) and (**d**) number of long duration  
418 HSE observed across the various lines. Total distance and maximum velocity were extracted  
419 directly from EthoVision XT 11.5 software while the number of events  $\geq 28$  mm/s (HSE) and  
420 long duration HSE ( $\geq 1$  s) were scored using an in-house MATLAB algorithm. Data displayed as  
421 scatter plots showing individual larval values and error bars represent mean and SEM. Statistics  
422 calculated using One-way ANOVA and *post hoc* Dunnett multiple comparison test,  $*p \leq 0.05$ ,  
423  $**p \leq 0.005$ ,  $***p < 0.0001$ .

424

425 **Supplementary Figure 5| Wild-type recording.** Representative raw LFP recording trace (top)  
426 along with a corresponding wavelet time-frequency spectrogram (bottom) for a representative  
427 WT zebrafish larvae. Scale bar = 500  $\mu$ V.

428

## 429 **Methods**

430

### 431 **Zebrafish Husbandry**

432 All procedures described herein were performed in accordance with the Guide for the Care and  
433 Use of Animals (ebruary Inc., 2011) and adhered to guidelines approved by the University of  
434 California, San Francisco Institution Animal Care and Use Committee (IACUC approval #: AN171512-03A). The zebrafish lines were maintained in a temperature-controlled facility on a  
435 14:10 hour light:dark cycle (9:00 AM -11:00 PM PST). Juvenile and adult zebrafish were housed  
436 on aquatic units with an automated feedback control unit that maintained the system water  
437

438 conditions within the following ranges: temperature; 28-30 °C, pH; 7.5-8.0 and conductivity;  
439 690-740 mS/cm. Juveniles (30-60 dpf) were fed twice daily, once with JBL powder (JBL  
440 NovoTom Artemia) and the other with JBL powder + live brine shrimp (Argent Aquaculture).  
441 Older juveniles and adults were also fed two times per day, first with flake food (tropical flakes,  
442 Tetramin) and then with flake food and live brine shrimp. Zebrafish embryos and larvae were  
443 raised in an incubator kept at 28.5 °C under the same light-dark cycle as the facility. The solution  
444 or ‘embryo medium’ used for the embryos and larvae consisted of 0.03% Instant Ocean  
445 (Aquarium Systems, Inc.) and 0.000002% methylene blue in reverse osmosis-distilled water.  
446 Larvae were fed with powder (6-10 dpf) or JBL powder + brine shrimp (11-29 dpf).

447

#### 448 **Zebrafish homology prediction**

449 To improve our confidence in modeling epilepsy at the genetic level in zebrafish, we established  
450 a zebrafish homology score. To determine the homology score the percent protein identity and  
451 DIOPT score was used. The percent protein identity was established from Ensembl (GRCz10)  
452 using the predicted human orthologue gene. When the human orthologue gene was not predicted  
453 by Ensembl, a Clustal Omega analysis was performed using standard parameters. The DIOPT  
454 score was established using the MARRVEL (<http://marrvel.org/>) database and is the number of  
455 orthologue prediction tools that predicted a given orthologue pair. Twelve orthologue prediction  
456 tools (Comara, Egglog, Homologene, Inparanoid, OMA, OrthoDB, orthoMCL, Panther,  
457 Phylome, RoundUP, TreeFam and ZFIN) were used to predict zebrafish orthologs. The  
458 homology score represents the average of the percent identity and the DICOT score as a  
459 percentage. A gene with a homology score >65 was considered for the EZP.

460

#### 461 **Zebrafish gene expression analysis**

462 Adult tissue expression was determined using the Phylofish database<sup>75</sup>. Development expression  
463 was determined using semi-quantitative RT-PCR. Pools of 25 to 50 zebrafish embryos or larvae  
464 were collected at 4-cell, 32-cell, high, sphere, 12 hpf, 1, 2, 3, 4, 5, and 7 dpf for expression  
465 analysis. Total mRNA was extracted from whole embryos or larvae using a phenol/chloroform  
466 extraction protocol. After extraction, 1 µg of purified RNA was treated with DNaseI and  
467 retrotranscribed to cDNA using following SuperScript IV Reverse Transcriptase (8091050,  
468 Invitrogen) the manufacturer's protocol. The temporal expression of genes was characterized RT-



469 PCR using GoTaq Master Mix (M712C, Promega) and oligonucleotide sequences are listed at  
470 <https://zebrafishproject.ucsf.edu>. Thermal cycling conditions included an initial denaturation at  
471 95°C for 5 min, followed by 40 cycles at 95°C for 30 sec, 56°C for 30 sec, and 72°C for 30 sec  
472 and a final incubation at 72°C for 7 min.

473

#### 474 **Generation of CRISPR mutant lines**

475 Zebrafish mutant lines of the 40 genes were generated using CRISPR-Cas gene editing in Tupfel  
476 Long-Fin (TL) wild-type zebrafish (ZIRC). CRISPRScan was used to identify sgRNA sequences  
477 with high predicted cut efficiencies for early exons and sgRNAs were synthesized using T7 in  
478 vitro transcription with the MEGAshortscript™ T7 Transcription Kit (AM1354,  
479 ThermoFisher). To minimize off target-effects, we selected target sites with the lowest number  
480 of potential mutagenesis and with a minimum of three mismatches with every other site in the  
481 genome. Fertilized embryos (1-2 cell stage) were co-injected with ~2 nl of sequence-specific  
482 sgRNA (~10-25 ng/μl), Cas9 mRNA (~250 ng/μl) and 0.4% rhodamine b. At 1 dpf, embryos  
483 were sorted for fluorescence and genomic DNA extracted using Zebrafish Quick Genotyping  
484 DNA Preparation Kit (GT02-02, Bioland Scientific) from pools of 5-10 healthy, microinjected  
485 and un-injected larvae. The samples were Sanger sequenced to assess gene editing at the guide  
486 target site. Once editing was confirmed, the remaining embryos were raised to adulthood.  
487 Resulting F0 mosaic adults, confirmed by Sanger sequencing DNA from fin-clips, were crossed  
488 with TL zebrafish to create stable heterozygote F2 and greater generations of breeders for our  
489 experiments. Guide RNA, primer sequences and PCR protocols for all lines can be found in  
490 Supplementary Table 3. All experiments were done blinded using unfed larvae between 3-14  
491 dpf. At this stage larvae are sexually indistinguishable.

492

#### 493 **Electrophysiology**

494 Zebrafish larvae (5-6 dpf) were randomly selected, briefly exposed to cold anesthesia or  
495 pancuronium (300 μM) and immobilized, dorsal side up, in 2% low-melting point agarose  
496 (BP1360-100, Fisher Scientific) within a vertical slice perfusion chamber (Siskiyou Corporation,  
497 #PC-V). Slice chambers containing one or two larvae, were placed on the stage of an upright  
498 microscope (Olympus BX-51W) and monitored continuously using a Zeiss Axiocam digital  
499 camera. Under visual guidance, gap-free local field potential recordings (LFP; 15 min duration)

500 were obtained from optic tectum using a single glass microelectrode (*WPI glass #TW150 F-3*); ~  
501 1  $\mu\text{m}$  tip diameter; 2 mM NaCl internal solution), as described<sup>43,44</sup>. LFP voltage signals were  
502 low-pass filtered at 1 kHz (-3 dB; eight-pole Bessel), digitized at 10 kHz using a Digidata 1320  
503 A/D interface (Molecular Devices) and stored on a PC computer running AxoScope 10.3  
504 software (Molecular Devices). For pharmacology experiments, continuous gap-free LFP  
505 recordings were made for 1 hr and drug concentrations are based on previously published  
506 data<sup>23,44</sup>. Larvae were gently freed from agarose at the conclusion of recording epochs for *post*  
507 *hoc* genotyping by investigators blind to status of the experiment. Electrophysiology files were  
508 also coded for *post hoc* analysis off-line. Experiments were performed on at least three  
509 independent clutches of larvae for each line; a minimum of 75 larvae were screened per line.  
510 Individual abnormal electrographic seizure-like events were defined as: (i) brief interictal-like  
511 events comprised of spike upward or downward membrane deflections greater than 3x baseline  
512 noise level or (ii) long duration, large amplitude ictal-like multi or poly-spike events greater than  
513 5x baseline noise level. Quantification of epileptiform events was performed using Clampfit 10.3  
514 (Molecular Devices) or custom MATLAB (MathWorks; Figure 3) software by investigators  
515 blind to status of the experiment. A binning method combined with a sliding window algorithm  
516 was used to calculate the active level of the signal within the current time window. The value of  
517 each bin was used to identify the start and end of an event. We used a range of voltage thresholds  
518 (0.15 – 0.25 mV, depending on the noise level) and a relative threshold (3x Standard Deviation)  
519 for detection of interictal events. By comparing manual-auto counting results of a testing data  
520 sample for each recording (Figure 4d), we fine-tuned the threshold detection for each recording  
521 to a level where auto counting results were close to the manual counting results (< 3%  
522 difference). All files were un-coded and combined with genotyping data at the end of this  
523 process.

524

## 525 **Larval Behavior**

### 526 *Basal locomotion*

527 Behavioral studies conducted on select EZP lines utilized a 96-well format and automated  
528 locomotion detection using a DanioVision system running EthoVision XT 11.5 software  
529 (DanioVision, Noldus Information Technology). Zebrafish larvae were transferred from their  
530 home incubator to the test room at least 10 min before the experiment. After larvae were

531 individually transferred to wells in ~150  $\mu$ l of embryo media, the 96 well-plate was placed in the  
532 DanioVision observation chamber and left undisturbed for 1 hr. Larval movement was tracked  
533 for 15 min at 25 frames per sec with the following detection settings: method; DanioVision,  
534 sensitivity; 110, video pixel smoothing; low, track noise reduction; on, subject contour; 1 pixel  
535 (contour dilation, erode first then dilate), subject size; 4-4065. For each zebrafish line,  
536 experiments were performed with at least 3 different clutches and *post hoc* genotyping. Mean  
537 and maximum velocity of each larvae were calculated. Additionally, high-speed seizure  
538 behaviors were scored using a MATLAB algorithm developed by our laboratory and validated  
539 on PTZ and *scn1lab* seizure models (Figure 7).

540

#### 541 *Seizure-like behavioral event classification*

542 To classify larval movements, we first processed the videos with EthoVision software 11.5  
543 (Noldus) to identify a larva's position at an acquisition rate of 25 frames/sec, using the same  
544 detection settings listed in the 'basal locomotion' assay, except with the track noise reduction off.  
545 Using custom-written MATLAB-based software, we then extracted movement events defined as  
546 times when larvae speed exceeded a threshold of 0.9 mm/sec for at least 160 msec. Adjacent  
547 events were combined if the time interval was less than 40 msec. Furthermore, when the  
548 maximum speed within an event was lower or higher than a cutoff threshold, the movement  
549 events were classified into low- and high- speed events, respectively. For the analysis in Figure  
550 7, we calculated the distribution of all movements in a large control group of larvae and then  
551 identified the speed value threshold at 1.5x Standard Deviation to be used as a cutoff threshold,  
552 unless otherwise specified. Similar results for larval WT movement speeds and duration have  
553 been previously reported<sup>76</sup>. Seizure-like events were defined as high-speed movement events that  
554 lasted longer than 1 sec validated on PTZ and *scn1lab* seizure models.

555

#### 556 *Behavioral effects of electrode implantation*

557 WT larvae (5 dpf) in 100 mm petri dishes were transferred to the test room and subjected to one  
558 of three treatments:

559

560 Treatment 1: Larvae were briefly anesthetized in pancuronium (300  $\mu$ M) and then immobilized  
561 in 2% agarose dorsal side up on a recording chamber. About 3 ml of recording media was added

562 to the chamber then a glass micro-electrode was positioned in the forebrain for LFP recording as  
563 previously described<sup>43,44</sup>. After 15-30 min, the electrode was removed and the larva gently  
564 released from agarose and transferred to a petri dish with embryo medium.

565

566 Treatment 2: Larvae were briefly anesthetized in pancuronium (300  $\mu$ M) and then immobilized  
567 in 2% agarose dorsal side up on a recording chamber. After 15-30 min, the larvae were gently  
568 released from the agarose and transferred to a petri dish with embryo medium.

569

570 Treatment 3: Larvae were left undisturbed in original petri dish.

571

572 At the end of the experiment, all treatment groups were returned to the home incubator until  
573 behavioral experiments. Four hours after treatment, larvae were returned to test room and left  
574 undisturbed for 10 min. Larvae were individually transferred to a 96 well plate in ~150  $\mu$ l of  
575 embryo media and the plate then placed in the DanioVision observation chamber. After 15 min,  
576 larval movement was tracked for 30 min using settings outlined in 'basal locomotion'. Once  
577 completed, the plate was removed and returned to the home incubator. The same steps were  
578 followed to record behavior 24 hr post-treatment.

579

## 580 **Survival Assay**

581 For each line, 20-24 zebrafish larvae were randomly selected from at least two clutches and were  
582 placed in a 100 mm petri dish containing ~40 ml egg water. The larvae were monitored twice  
583 daily and dead larvae were lysed using Bioland Zebrafish Quick Lysis Kit. Larvae were not fed  
584 throughout the duration of the assay. This was done to eliminate potential effects of variations in  
585 larval feeding, ultimately providing us with a robust method to identify early-stage larval  
586 lethality phenotypes. Unfed larvae typically die by 12 dpf<sup>77</sup>. Samples were genotyped using  
587 protocols specified in Supplementary Table 3.

588

### 589 *Pyridoxine supplementation: aldh7a1 survival*

590 At 4 dpf, larvae were placed individually in 24 well plate with 500  $\mu$ l 10 mM pyridoxine or egg  
591 water (control). Treatment was removed and replaced with fresh egg water. Larvae were then  
592 treated with 500  $\mu$ l 10 mM pyridoxine or egg water (control) for 30 min daily. During daily

593 monitoring, dead larvae were lysed using Bioland Zebrafish Quick Lysis Kit. Samples were  
594 genotyped using protocols specified in Supplementary Table 3.

595

## 596 **Imaging**

597 For morphology measurements in the *eefla2* CRISPR line, larvae were placed individually in  
598 one well of a  $\mu$ -well microscope slide (iBidi) and high-resolution images obtained using an  
599 optiMOS CMOS camera (QImaging) camera mounted on a SteREO Discovery.V8  
600 stereomicroscope (Zeiss). Files were coded and processed by an investigator blind to status of  
601 the experiment. Larvae were collected for independent *post hoc* genotyping at the conclusion of  
602 image acquisition. Images were analyzed by a third investigator using DanioScope software  
603 (Noldus, version 1.0.109). Standard head (overall head length, midbrain and forebrain widths)  
604 and body length (distance from anterior tip of head to base of caudal fin) measurements were  
605 obtained. Files were un-coded and combined with genotyping data at the end of this process.

606

## 607 *Interneuron Quantification*

608 For imaging studies, *arxa* CRISPR line was crossed with a *dlx5a-dlx6a:GFP:nacre* transgenic  
609 zebrafish line provided by Marc Ekker<sup>52</sup>. For analysis of interneuron density in *arxa* WT and  
610 homozygote mutants, green fluorescent protein (GFP)-expressing larvae were sorted by  
611 fluorescence at 2 to 3 dpf and imaged at 5 dpf using a Zeiss Z.1 light sheet microscope with a  
612 20X objective. Zebrafish were anesthetized in 0.04% tricaine mesylate and embedded in 2% low  
613 melting point agarose inside a glass capillary. The imaging sample chamber was filled with  
614 embryo medium. Z-stack images were acquired at 5  $\mu$ m intervals starting at the first visible  
615 dorsal GFP-positive cell. Following image acquisition, larvae were gently removed from agar  
616 and independently genotyped. Imaging files were coded and analyzed *post hoc* by an investigator  
617 blind to status of the experiment. Images were then processed in Fiji (ImageJ)<sup>78</sup>. Neurons were  
618 quantified with an algorithm modified from “3D watershed technique” (ImageJ macro developed  
619 by [Bindokas V, 17-September-2014. Available:  
620 [https://digital.bsd.uchicago.edu/%5Cimagej\\_macros.html](https://digital.bsd.uchicago.edu/%5Cimagej_macros.html)]).

621

## 622 **Statistical analysis**

623 Statistical tests were performed using MATLAB or GraphPad Prism. One-way ANOVA with  
624 Dunnett's multiple comparison tests or non-parametric *t* tests were used. Data are presented as  
625 mean  $\pm$  S.E.M. Individual analyses are described in Results.

626

### 627 **Data and software availability**

628 All custom MATLAB programs will be made available upon reasonable request. Representative  
629 electrophysiology tracings, Kaplan-Meier survival plots, behavioral data, sequencing information  
630 are available on our web-portal (<https://zebrafishproject.ucsf.edu>). The datasets generated during  
631 the current studies are available from the corresponding author on reasonable request.

632

### 633 **Reporting summary**

634 Further information on research design is available in the Nature Research Reporting Summary  
635 linked to this article.

636

### 637 **Ethics declarations**

#### 638 *Competing interests*

639 S.C.B. is a co-Founder and Scientific Advisor for EpyGenix Therapeutics. S.C.B. is on the  
640 Scientific Advisory Board of ZeClinics. The remaining authors declare that the research was  
641 conducted in the absence of any commercial or financial relationships that could be construed as  
642 a potential conflict of interest.

643

### 644 **Acknowledgements**

645 We would like to thank Dan Lowenstein, Gemma Carvill and Robert Hunt for comments and  
646 feedback on conceptualization of the Epilepsy Zebrafish Project. We thank Kathryn Salvati and  
647 Mark Beenhakker for sharing MATLAB code for generation of time-frequency histograms. We  
648 thank Sarai Diaz and Ifechukwu Okeke for assistance on maintenance of zebrafish lines. This  
649 work was supported by NIH/NINDS R01 award #NS103139 (to S.C.B.); International  
650 Foundation for CDKL5 Research and Bow Foundation grants (to S.C.B.); Lennox-Gastaut  
651 Syndrome Foundation fellowships (to B.G. and C.C); and a Dravet Syndrome Foundation  
652 fellowship (to A.G.).

653

654 **Author Contributions**

655 A.G. & S.C.B. conceived the project. A.G. & C.C. designed the CRISPR strategy and trained  
656 subsequent personnel on generation of mutant lines. A.G. & C.C. directed and supervised the  
657 research. A.G., C.C., J.L., B.G., & K.H. generated mutant zebrafish lines. A.G., K.H. & M.A.  
658 conducted the gene expression studies. C.C. designed and guided the behavioral assay studies.  
659 C.C. & C.O. collected the behavioral data and C.C., C.O. & R. P. analyzed the data. S.C.B.,  
660 M.M., & M.T.D. collected and analyzed electrophysiology data. T.Q. & J.L. collected and  
661 analyzed light sheet microscopy data. C.C., M.M., & F.F. collected and analyzed survival data.  
662 J.L. & R.P. designed and wrote MATLAB programs for data analysis. M.M. & C.O. created the  
663 database website. M.T.D., M.A., C.O. & F.F. maintained the zebrafish colony. A.G., C.C. &  
664 S.C.B. wrote and edited the paper.

665

666 **Additional information**

667 Supplementary Information is available for this paper.

668

669 Correspondence and requests for materials should be addressed to Scott C. Baraban  
670 ([scott.baraban@ucsf.edu](mailto:scott.baraban@ucsf.edu))

671

672 **References**

- 673 1 Shields, W. D. Catastrophic epilepsy in childhood. *Epilepsia* **41 Suppl 2**, S2-6,  
674 doi:10.1111/j.1528-1157.2000.tb01518.x (2000).
- 675 2 Camfield, P. & Camfield, C. Epileptic syndromes in childhood: clinical features,  
676 outcomes, and treatment. *Epilepsia* **43 Suppl 3**, 27-32, doi:10.1046/j.1528-  
677 1157.43.s.3.3.x (2002).
- 678 3 Katsnelson, A., Buzsáki, G. & Swann, J. W. Catastrophic childhood epilepsy: a recent  
679 convergence of basic and clinical neuroscience. *Sci Transl Med* **6**, 262ps213,  
680 doi:10.1126/scitranslmed.3010531 (2014).
- 681 4 Pal, D. K., Pong, A. W. & Chung, W. K. Genetic evaluation and counseling for epilepsy.  
682 *Nat Rev Neurol* **6**, 445-453, doi:10.1038/nrneurol.2010.92 (2010).
- 683 5 Myers, C. T. & Mefford, H. C. Advancing epilepsy genetics in the genomic era. *Genome*  
684 *Med* **7**, 91, doi:10.1186/s13073-015-0214-7 (2015).
- 685 6 Perucca, P. & Perucca, E. Identifying mutations in epilepsy genes: Impact on treatment  
686 selection. *Epilepsy Res* **152**, 18-30, doi:10.1016/j.eplepsyres.2019.03.001 (2019).
- 687 7 Hamdan, F. F. *et al.* High Rate of Recurrent De Novo Mutations in Developmental and  
688 Epileptic Encephalopathies. *Am J Hum Genet* **101**, 664-685,  
689 doi:10.1016/j.ajhg.2017.09.008 (2017).

- 690 8 Epi4K Consortium *et al.* De novo mutations in epileptic encephalopathies. *Nature* **501**,  
691 217-221, doi:10.1038/nature12439 (2013).
- 692 9 Mastrangelo, M. & Leuzzi, V. Genes of early-onset epileptic encephalopathies: from  
693 genotype to phenotype. *Pediatr Neurol* **46**, 24-31,  
694 doi:10.1016/j.pediatrneurol.2011.11.003 (2012).
- 695 10 Epilepsy Genetics Initiative. The Epilepsy Genetics Initiative: Systematic reanalysis of  
696 diagnostic exomes increases yield. *Epilepsia* **60**, 797-806, doi: 10.1111/epi.14698 (2018).
- 697 11 EpiPM Consortium. A roadmap for precision medicine in the epilepsies. *Lancet Neurol*  
698 **14**, 1219-1228, doi:10.1016/S1474-4422(15)00199-4 (2015).
- 699 12 Howe, K. *et al.* The zebrafish reference genome sequence and its relationship to the  
700 human genome. *Nature* **496**, 498-503, doi:10.1038/nature12111 (2013).
- 701 13 Liu, J. *et al.* CRISPR/Cas9 in zebrafish: an efficient combination for human genetic  
702 diseases modeling. *Hum Genet* **136**, 1-12, doi:10.1007/s00439-016-1739-6 (2017).
- 703 14 Adamson, K. I., Sheridan, E. & Grierson, A. J. Use of zebrafish models to investigate rare  
704 human disease. *J Med Genet* **55**, 641-649, doi:10.1136/jmedgenet-2018-105358 (2018).
- 705 15 Liu, C. X. *et al.* CRISPR/Cas9-induced shank3b mutant zebrafish display autism-like  
706 behaviors. *Mol Autism* **9**, 23, doi:10.1186/s13229-018-0204-x (2018).
- 707 16 Thyme, S. B. *et al.* Phenotypic Landscape of Schizophrenia-Associated Genes Defines  
708 Candidates and Their Shared Functions. *Cell* **177**, 478-491.e420,  
709 doi:10.1016/j.cell.2019.01.048 (2019).
- 710 17 Tang, W. *et al.* Genetic Control of Collective Behavior in Zebrafish. *iScience* **23**, 100942,  
711 doi:10.1016/j.isci.2020.100942 (2020).
- 712 18 Vaz, R., Hofmeister, W. & Lindstrand, A. Zebrafish Models of Neurodevelopmental  
713 Disorders: Limitations and Benefits of Current Tools and Techniques. *Int J Mol Sci* **20**,  
714 doi:10.3390/ijms20061296 (2019).
- 715 19 Sakai, C., Ijaz, S. & Hoffman, E. J. Zebrafish Models of Neurodevelopmental Disorders:  
716 Past, Present, and Future. *Front Mol Neurosci* **11**, 294, doi:10.3389/fnmol.2018.00294  
717 (2018).
- 718 20 Gupta, T. *et al.* Morphometric analysis and neuroanatomical mapping of the zebrafish  
719 brain. *Methods* **150**, 49-62, doi:10.1016/j.ymeth.2018.06.008 (2018).
- 720 21 Khan, K. M. *et al.* Zebrafish models in neuropsychopharmacology and CNS drug  
721 discovery. *Br J Pharmacol* **174**, 1925-1944, doi:10.1111/bph.13754 (2017).
- 722 22 Cornet, C., Di Donato, V. & Terriente, J. Combining Zebrafish and CRISPR/Cas9: Toward a  
723 More Efficient Drug Discovery Pipeline. *Front Pharmacol* **9**, 703,  
724 doi:10.3389/fphar.2018.00703 (2018).
- 725 23 Baraban, S. C., Dinday, M. T. & Hortopan, G. A. Drug screening in Scn1a zebrafish mutant  
726 identifies clemizole as a potential Dravet syndrome treatment. *Nat Commun* **4**, 2410,  
727 doi:10.1038/ncomms3410 (2013).
- 728 24 Griffin, A. *et al.* Clemizole and modulators of serotonin signalling suppress seizures in  
729 Dravet syndrome. *Brain* **140**, 669-683, doi:10.1093/brain/aww342 (2017).
- 730 25 Cully, M. Zebrafish earn their drug discovery stripes. *Nat Rev Drug Discov* **18**, 811-813,  
731 doi:10.1038/d41573-019-00165-x (2019).



- 732 26 Weuring, W. J. *et al.* NaV1.1 and NaV1.6 selective compounds reduce the behavior  
733 phenotype and epileptiform activity in a novel zebrafish model for Dravet Syndrome.  
734 *PLoS one* **15**, e0219106-e0219106, doi:10.1371/journal.pone.0219106 (2020).
- 735 27 Dinday, M. T. & Baraban, S. C. Large-Scale Phenotype-Based Antiepileptic Drug  
736 Screening in a Zebrafish Model of Dravet Syndrome. *eNeuro* **2**,  
737 doi:10.1523/eneuro.0068-15.2015 (2015).
- 738 28 Thornton, C., Dickson, K. E., Carty, D. R., Ashpole, N. M. & Willett, K. L. Cannabis  
739 constituents reduce seizure behavior in chemically-induced and scn1a-mutant zebrafish.  
740 *Epilepsy Behav* **110**, 107152, doi:10.1016/j.yebeh.2020.107152 (2020).
- 741 29 Griffin, A., Anvar, M., Hamling, K. & Baraban, S. C. Phenotype-Based Screening of  
742 Synthetic Cannabinoids in a Dravet Syndrome Zebrafish Model. *Front Pharmacol* **11**,  
743 464, doi:10.3389/fphar.2020.00464 (2020).
- 744 30 Epilepsy, C. o. C. a. T. o. t. I. L. A. Proposal for revised clinical and  
745 electroencephalographic classification of epileptic seizures. From the Commission on  
746 Classification and Terminology of the International League Against Epilepsy. *Epilepsia*  
747 **22**, 489-501, doi:10.1111/j.1528-1157.1981.tb06159.x (1981).
- 748 31 Engel, J., Jr. A proposed diagnostic scheme for people with epileptic seizures and with  
749 epilepsy: report of the ILAE Task Force on Classification and Terminology. *Epilepsia* **42**,  
750 796-803, doi:10.1046/j.1528-1157.2001.10401.x (2001).
- 751 32 Berg, A. T. *et al.* Revised terminology and concepts for organization of seizures and  
752 epilepsies: report of the ILAE Commission on Classification and Terminology, 2005-2009.  
753 *Epilepsia* **51**, 676-685, doi:10.1111/j.1528-1167.2010.02522.x (2010).
- 754 33 Fisher, R. S. *et al.* Operational classification of seizure types by the International League  
755 Against Epilepsy: Position Paper of the ILAE Commission for Classification and  
756 Terminology. *Epilepsia* **58**, 522-530, doi:10.1111/epi.13670 (2017).
- 757 34 Akman, O. *et al.* Methodologic recommendations and possible interpretations of video-  
758 EEG recordings in immature rodents used as experimental controls: A TASK1-WG2  
759 report of the ILAE/AES Joint Translational Task Force. *Epilepsia Open* **3**, 437-459,  
760 doi:10.1002/epi4.12262 (2018).
- 761 35 Grone, B. P. & Baraban, S. C. Animal models in epilepsy research: legacies and new  
762 directions. *Nat Neurosci* **18**, 339-343, doi:10.1038/nn.3934 (2015).
- 763 36 Wong, M. & Roper, S. N. Genetic animal models of malformations of cortical  
764 development and epilepsy. *J Neurosci Methods* **260**, 73-82,  
765 doi:10.1016/j.jneumeth.2015.04.007 (2016).
- 766 37 Demarest, S. T. & Brooks-Kayal, A. From molecules to medicines: the dawn of targeted  
767 therapies for genetic epilepsies. *Nat Rev Neurol* **14**, 735-745, doi:10.1038/s41582-018-  
768 0099-3 (2018).
- 769 38 Yang, Y. & Frankel, W. N. Genetic approaches to studying mouse models of human  
770 seizure disorders. *Adv Exp Med Biol* **548**, 1-11, doi:10.1007/978-1-4757-6376-8\_1  
771 (2004).
- 772 39 Hwang, W. Y. *et al.* Heritable and precise zebrafish genome editing using a CRISPR-Cas  
773 system. *PLoS One* **8**, e68708, doi:10.1371/journal.pone.0068708 (2013).
- 774 40 Hwang, W. Y. *et al.* Efficient genome editing in zebrafish using a CRISPR-Cas system. *Nat*  
775 *Biotechnol* **31**, 227-229, doi:10.1038/nbt.2501 (2013).

- 776 41 Allen, A. S. *et al.* De novo mutations in epileptic encephalopathies. *Nature* **501**, 217-221,  
777 doi:10.1038/nature12439 (2013).
- 778 42 Grone, B. P. *et al.* Epilepsy, Behavioral Abnormalities, and Physiological Comorbidities in  
779 Syntaxin-Binding Protein 1 (STXBP1) Mutant Zebrafish. *PLoS One* **11**, e0151148,  
780 doi:10.1371/journal.pone.0151148 (2016).
- 781 43 Baraban, S. C. Forebrain electrophysiological recording in larval zebrafish. *J Vis Exp*,  
782 doi:10.3791/50104 (2013).
- 783 44 Baraban, S. C., Taylor, M. R., Castro, P. A. & Baier, H. Pentylentetrazole induced  
784 changes in zebrafish behavior, neural activity and c-fos expression. *Neuroscience* **131**,  
785 759-768, doi:10.1016/j.neuroscience.2004.11.031 (2005).
- 786 45 Baraban, S. C. *et al.* A large-scale mutagenesis screen to identify seizure-resistant  
787 zebrafish. *Epilepsia* **48**, 1151-1157, doi:10.1111/j.1528-1167.2007.01075.x (2007).
- 788 46 Pena, I. A. *et al.* Pyridoxine-Dependent Epilepsy in Zebrafish Caused by Aldh7a1  
789 Deficiency. *Genetics* **207**, 1501-1518, doi:10.1534/genetics.117.300137 (2017).
- 790 47 Hunyadi, B., Siekierska, A., Sourbron, J., Copmans, D. & de Witte, P. A. M. Automated  
791 analysis of brain activity for seizure detection in zebrafish models of epilepsy. *J Neurosci*  
792 *Methods* **287**, 13-24, doi:10.1016/j.jneumeth.2017.05.024 (2017).
- 793 48 Koutroumanidis, M. *et al.* The role of EEG in the diagnosis and classification of the  
794 epilepsy syndromes: a tool for clinical practice by the ILAE Neurophysiology Task Force  
795 (Part 1). *Epileptic Disord* **19**, 233-298, doi:10.1684/epd.2017.0935 (2017).
- 796 49 Kato, M. & Dobyns, W. B. X-linked lissencephaly with abnormal genitalia as a tangential  
797 migration disorder causing intractable epilepsy: proposal for a new term,  
798 "interneuronopathy". *J Child Neurol* **20**, 392-397, doi:10.1177/08830738050200042001  
799 (2005).
- 800 50 Marsh, E. D. *et al.* Developmental interneuron subtype deficits after targeted loss of Arx.  
801 *BMC Neurosci* **17**, 35, doi:10.1186/s12868-016-0265-8 (2016).
- 802 51 Friocourt, G. & Parnavelas, J. G. Mutations in ARX Result in Several Defects Involving  
803 GABAergic Neurons. *Front Cell Neurosci* **4**, 4, doi:10.3389/fncel.2010.00004 (2010).
- 804 52 Yu, M. *et al.* Activity of dlx5a/dlx6a regulatory elements during zebrafish GABAergic  
805 neuron development. *Int J Dev Neurosci* **29**, 681-691,  
806 doi:10.1016/j.ijdevneu.2011.06.005 (2011).
- 807 53 McLachlan, F., Sires, A. M. & Abbott, C. M. The role of translation elongation factor eEF1  
808 subunits in neurodevelopmental disorders. *Hum Mutat* **40**, 131-141,  
809 doi:10.1002/humu.23677 (2019).
- 810 54 Papandreou, A. *et al.* GABRB3 mutations: a new and emerging cause of early infantile  
811 epileptic encephalopathy. *Dev Med Child Neurol* **58**, 416-420, doi:10.1111/dmcn.12976  
812 (2016).
- 813 55 Zabinyakov, N. *et al.* Characterization of the first knock-out aldh7a1 zebrafish model for  
814 pyridoxine-dependent epilepsy using CRISPR-Cas9 technology. *PLOS ONE* **12**, e0186645,  
815 doi:10.1371/journal.pone.0186645 (2017).
- 816 56 Leu, C. *et al.* Polygenic burden in focal and generalized epilepsies. *Brain* **142**, 3473-3481,  
817 doi:10.1093/brain/awz292 (2019).
- 818 57 Henshall, D. C. & Kobow, K. Epigenetics and Epilepsy. *Cold Spring Harb Perspect Med* **5**,  
819 doi:10.1101/cshperspect.a022731 (2015).

- 820 58 Zhang, Y. H. *et al.* Genetic epilepsy with febrile seizures plus: Refining the spectrum.  
821 *Neurology* **89**, 1210-1219, doi:10.1212/wnl.0000000000004384 (2017).
- 822 59 Amendola, E. *et al.* Mapping pathological phenotypes in a mouse model of CDKL5  
823 disorder. *PLoS One* **9**, e91613, doi:10.1371/journal.pone.0091613 (2014).
- 824 60 Wang, I. T. *et al.* Loss of CDKL5 disrupts kinome profile and event-related potentials  
825 leading to autistic-like phenotypes in mice. *Proc Natl Acad Sci U S A* **109**, 21516-21521,  
826 doi:10.1073/pnas.1216988110 (2012).
- 827 61 Kim, Y. J. *et al.* Chd2 Is Necessary for Neural Circuit Development and Long-Term  
828 Memory. *Neuron* **100**, 1180-1193.e1186, doi:10.1016/j.neuron.2018.09.049 (2018).
- 829 62 Yuskaitis, C. J. *et al.* A mouse model of DEPDC5-related epilepsy: Neuronal loss of  
830 Depdc5 causes dysplastic and ectopic neurons, increased mTOR signaling, and seizure  
831 susceptibility. *Neurobiol Dis* **111**, 91-101, doi:10.1016/j.nbd.2017.12.010 (2018).
- 832 63 Zaman, T., Abou Tayoun, A. & Goldberg, E. M. A single-center SCN8A-related epilepsy  
833 cohort: clinical, genetic, and physiologic characterization. *Ann Clin Transl Neurol* **6**, 1445-  
834 1455, doi:10.1002/acn3.50839 (2019).
- 835 64 Kolc, K. L. *et al.* A systematic review and meta-analysis of 271 PCDH19-variant  
836 individuals identifies psychiatric comorbidities, and association of seizure onset and  
837 disease severity. *Mol Psychiatry* **24**, 241-251, doi:10.1038/s41380-018-0066-9 (2019).
- 838 65 Borlot, F., Whitney, R., Cohn, R. D. & Weiss, S. K. MEF2C-related epilepsy: Delineating  
839 the phenotypic spectrum from a novel mutation and literature review. *Seizure* **67**, 86-  
840 90, doi:10.1016/j.seizure.2019.03.015 (2019).
- 841 66 Mirzaa, G. M. *et al.* CDKL5 and ARX mutations in males with early-onset epilepsy. *Pediatr*  
842 *Neurol* **48**, 367-377, doi:10.1016/j.pediatrneurol.2012.12.030 (2013).
- 843 67 Scheldeman, C. *et al.* mTOR-related neuropathology in mutant tsc2 zebrafish:  
844 Phenotypic, transcriptomic and pharmacological analysis. *Neurobiol Dis* **108**, 225-237,  
845 doi:10.1016/j.nbd.2017.09.004 (2017).
- 846 68 Liao, M. *et al.* Targeted knockout of GABA-A receptor gamma 2 subunit provokes  
847 transient light-induced reflex seizures in zebrafish larvae. *Dis Model Mech* **12**,  
848 doi:10.1242/dmm.040782 (2019).
- 849 69 Fuller, T. D., Westfall, T. A., Das, T., Dawson, D. V. & Slusarski, D. C. High-throughput  
850 behavioral assay to investigate seizure sensitivity in zebrafish implicates ZFX3 in  
851 epilepsy. *J Neurogenet* **32**, 92-105, doi:10.1080/01677063.2018.1445247 (2018).
- 852 70 Hoffman, E. J. *et al.* Estrogens Suppress a Behavioral Phenotype in Zebrafish Mutants of  
853 the Autism Risk Gene, CNTNAP2. *Neuron* **89**, 725-733,  
854 doi:10.1016/j.neuron.2015.12.039 (2016).
- 855 71 Brueggeman, L. *et al.* Drug repositioning in epilepsy reveals novel antiseizure  
856 candidates. *Ann Clin Transl Neurol* **6**, 295-309, doi:10.1002/acn3.703 (2019).
- 857 72 Teng, Y. *et al.* Knockdown of zebrafish Lgi1a results in abnormal development, brain  
858 defects and a seizure-like behavioral phenotype. *Hum Mol Genet* **19**, 4409-4420,  
859 doi:10.1093/hmg/ddq364 (2010).
- 860 73 Samarut, É. *et al.*  $\gamma$ -Aminobutyric acid receptor alpha 1 subunit loss of function causes  
861 genetic generalized epilepsy by impairing inhibitory network neurodevelopment.  
862 *Epilepsia* **59**, 2061-2074, doi:10.1111/epi.14576 (2018).

- 863 74 Liu, F. *et al.* A novel LGI1 missense mutation causes dysfunction in cortical neuronal  
864 migration and seizures. *Brain Res* **1721**, 146332, doi:10.1016/j.brainres.2019.146332  
865 (2019).
- 866 75 Pasquier, J. *et al.* Gene evolution and gene expression after whole genome duplication  
867 in fish: the PhyloFish database. *BMC Genomics* **17**, 368, doi:10.1186/s12864-016-2709-z  
868 (2016).
- 869 76 Mirat, O., Sternberg, J. R., Severi, K. E. & Wyart, C. ZebraZoom: an automated program  
870 for high-throughput behavioral analysis and categorization. *Front Neural Circuits* **7**, 107,  
871 doi:10.3389/fncir.2013.00107 (2013).
- 872 77 Lucore, E. C. & Connaughton, V. P. Observational learning and irreversible starvation in  
873 first-feeding zebrafish larvae: is it okay to copy from your friends? *Zoology* **145**, 125896,  
874 doi:<https://doi.org/10.1016/j.zool.2021.125896> (2021).
- 875 78 Schindelin, J. *et al.* Fiji: an open-source platform for biological-image analysis. *Nat*  
876 *Methods* **9**, 676-682, doi:10.1038/nmeth.2019 (2012).  
877

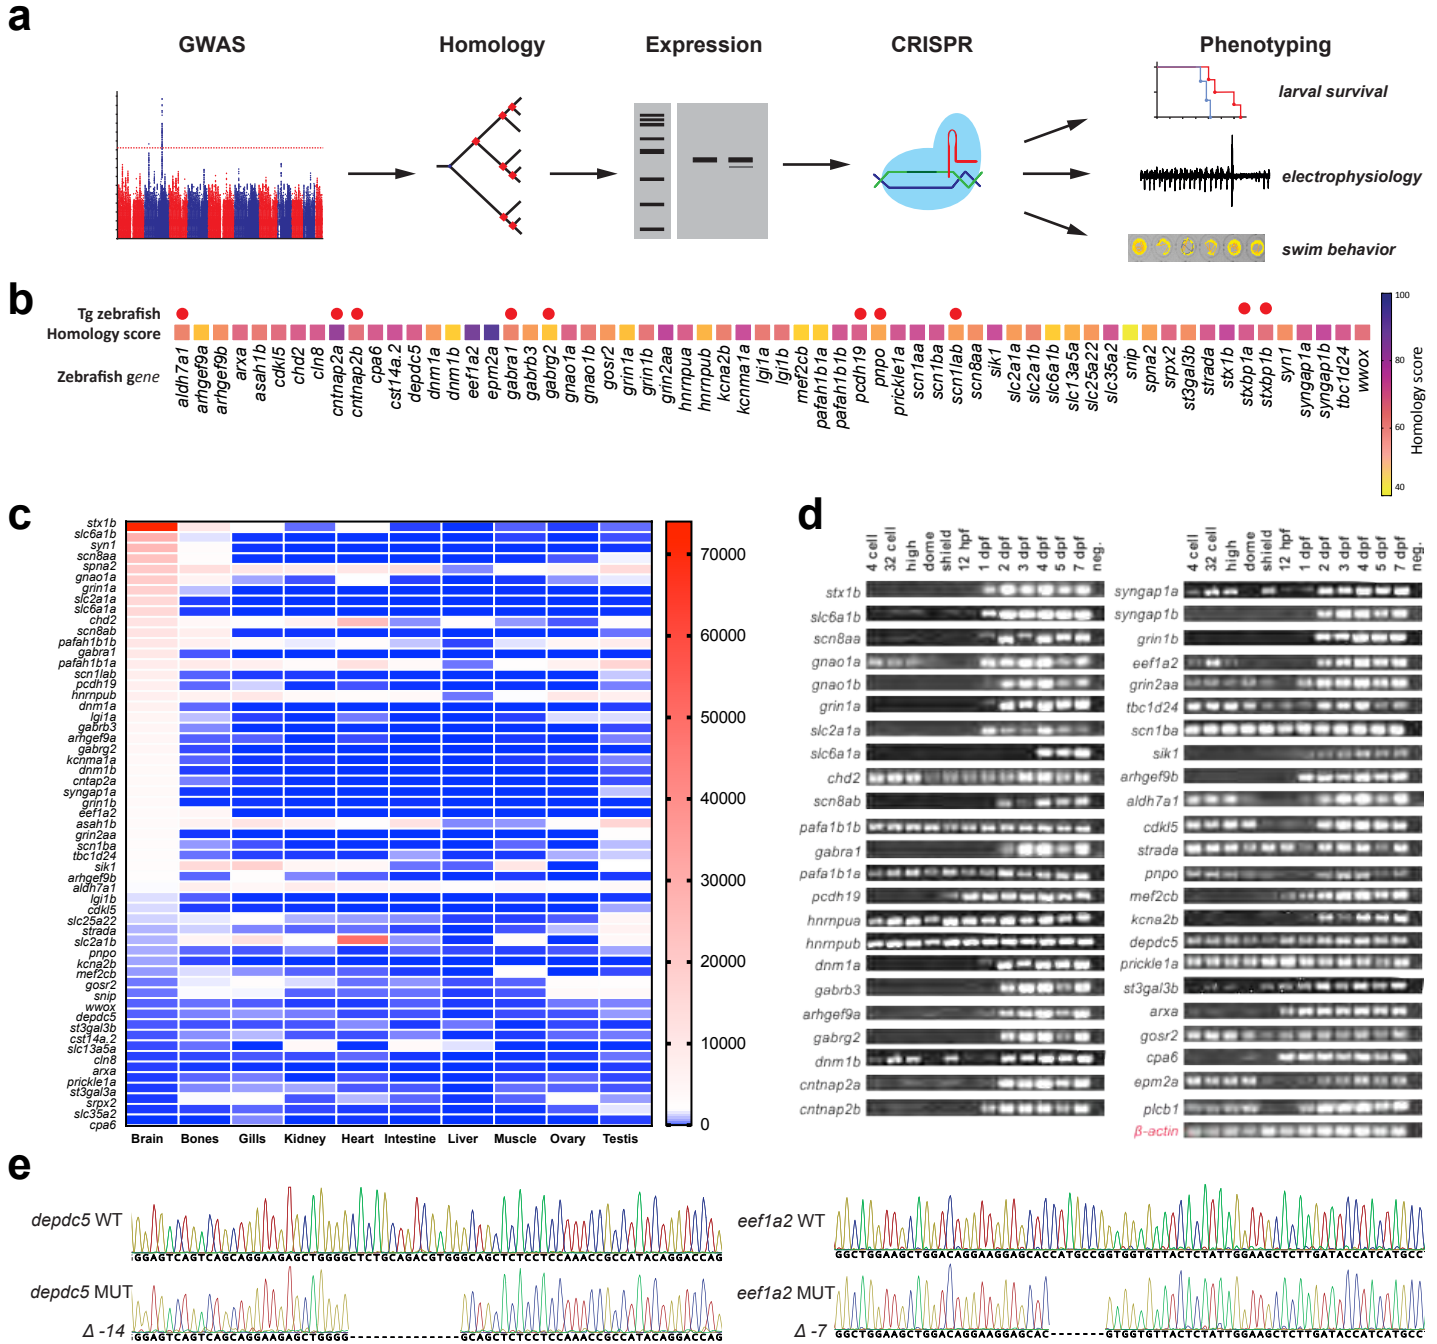

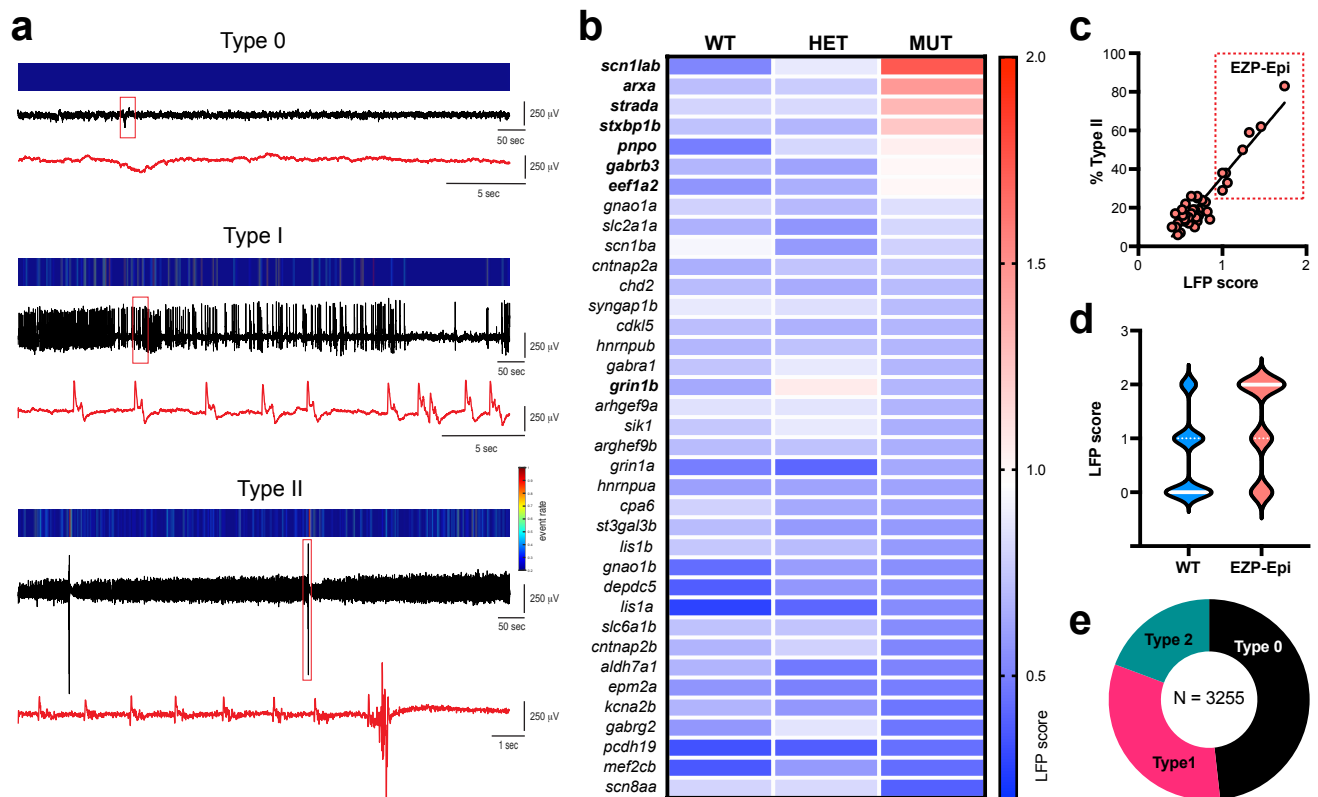

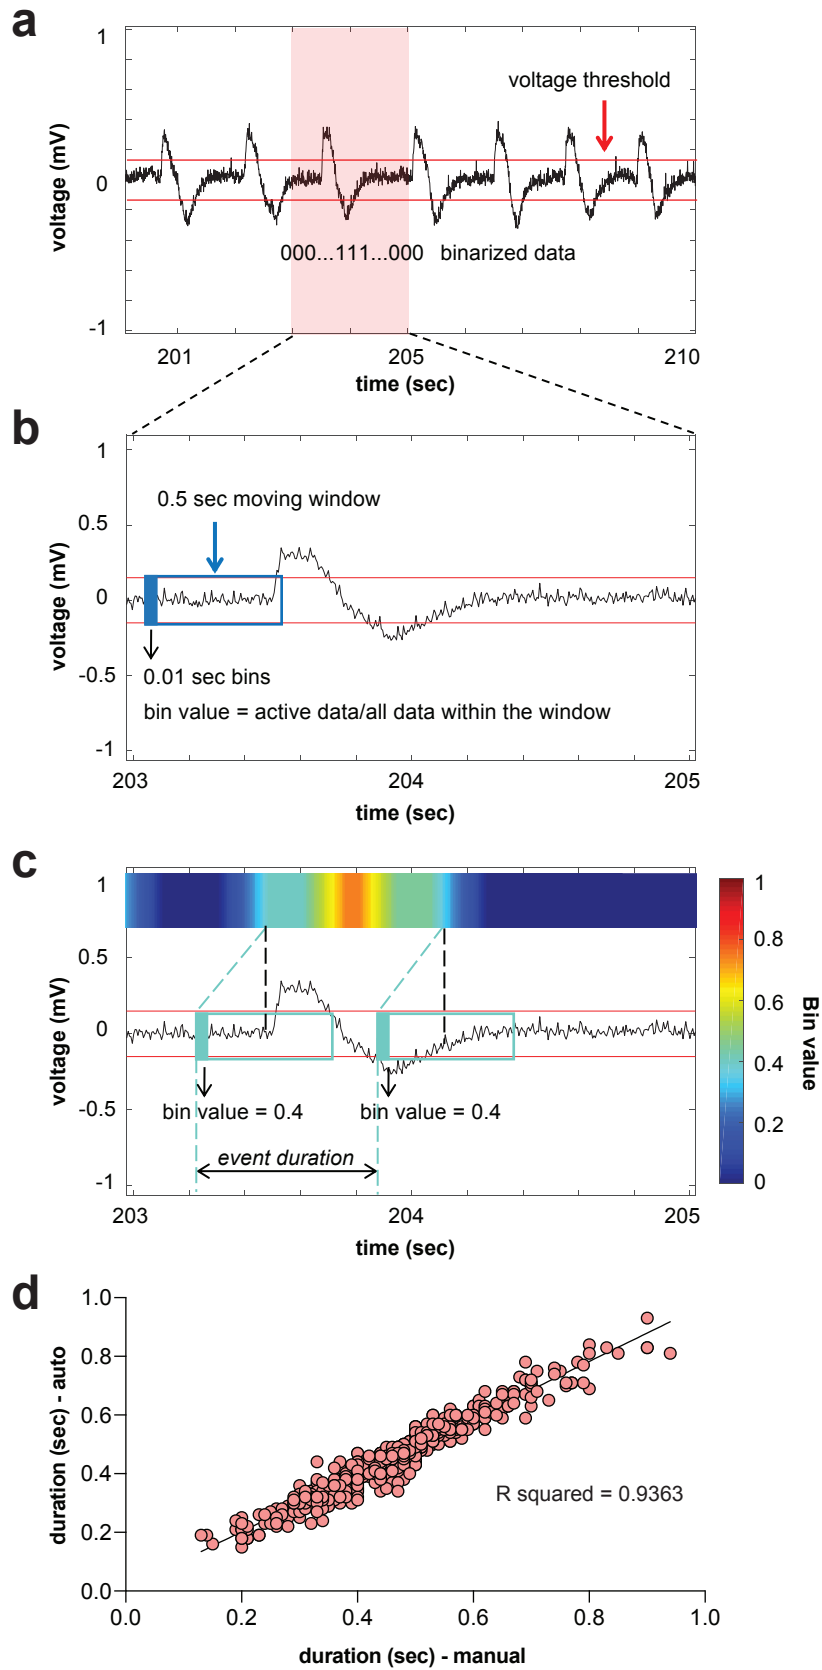

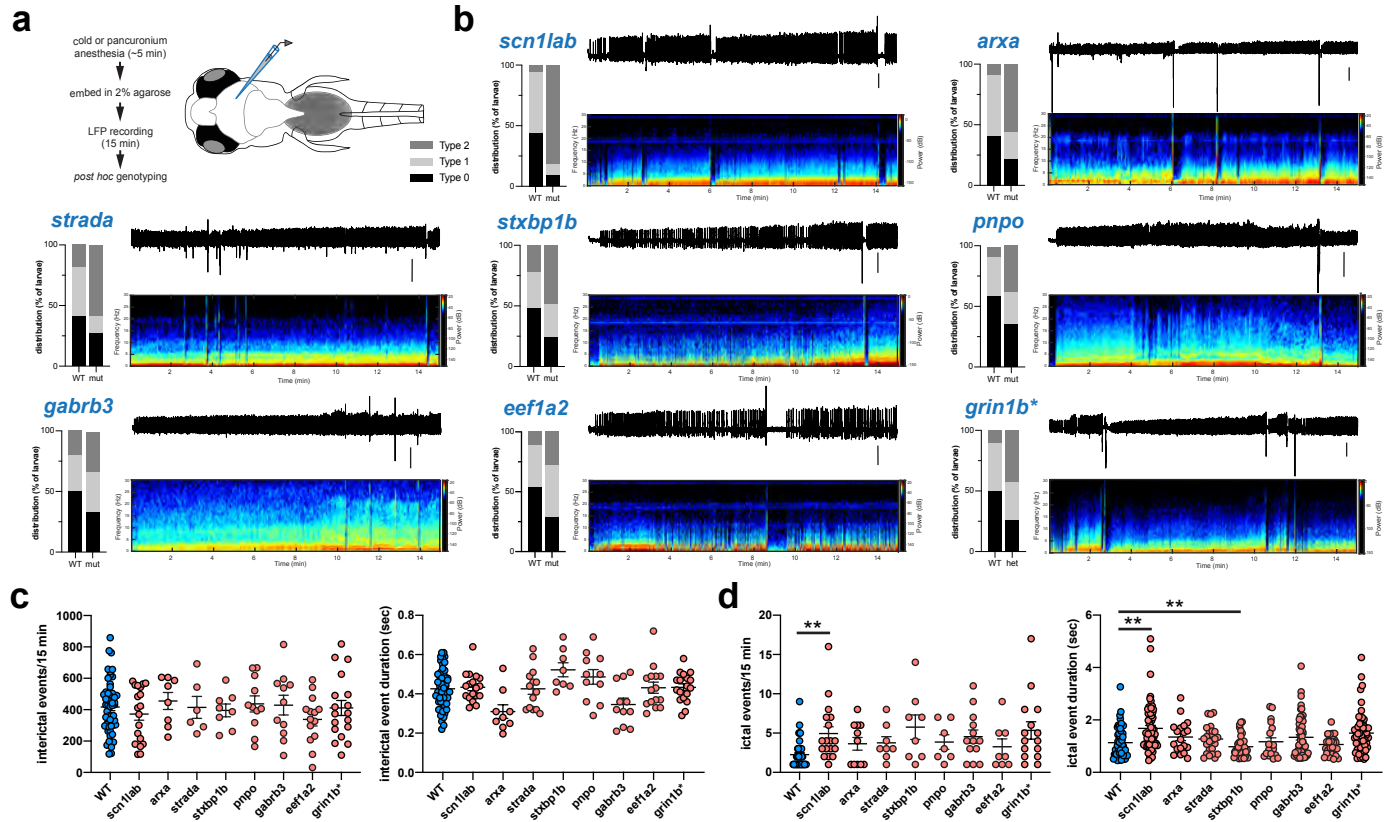



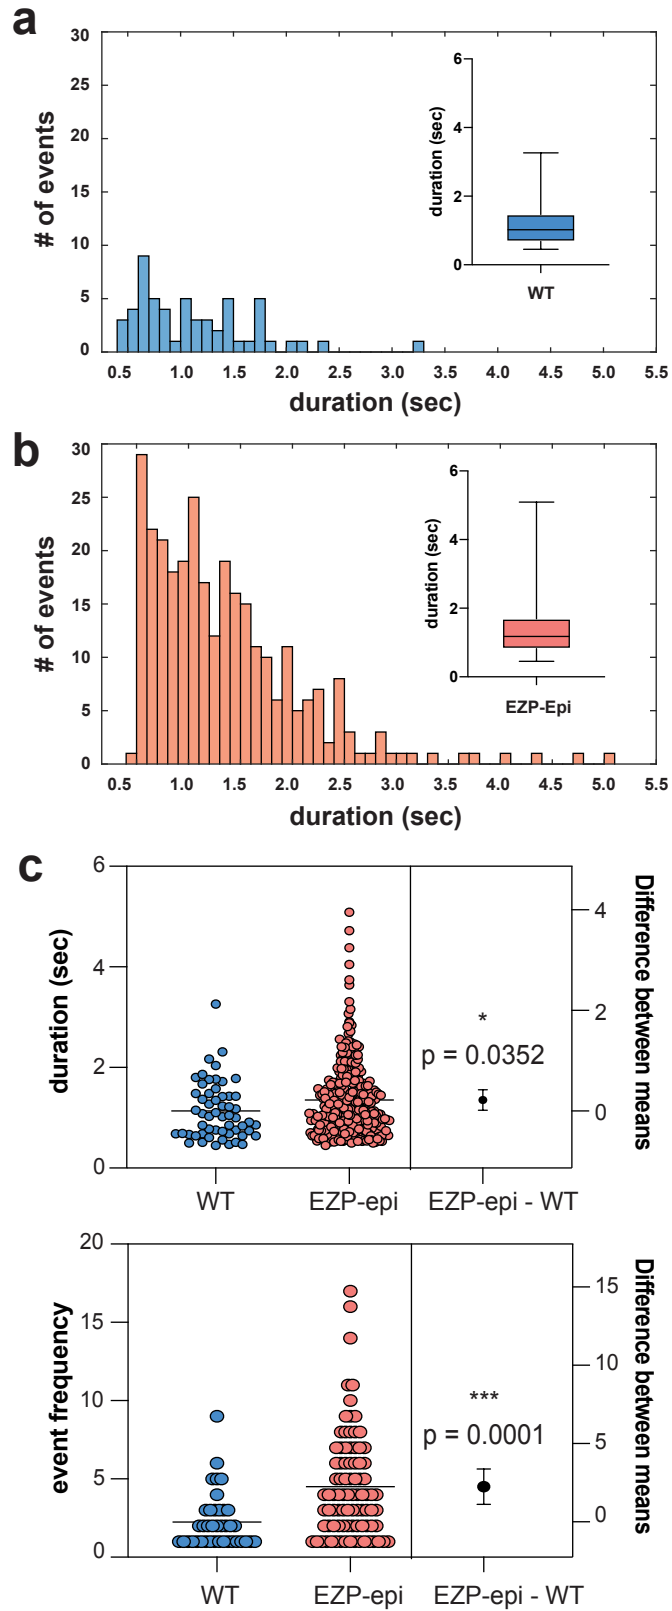

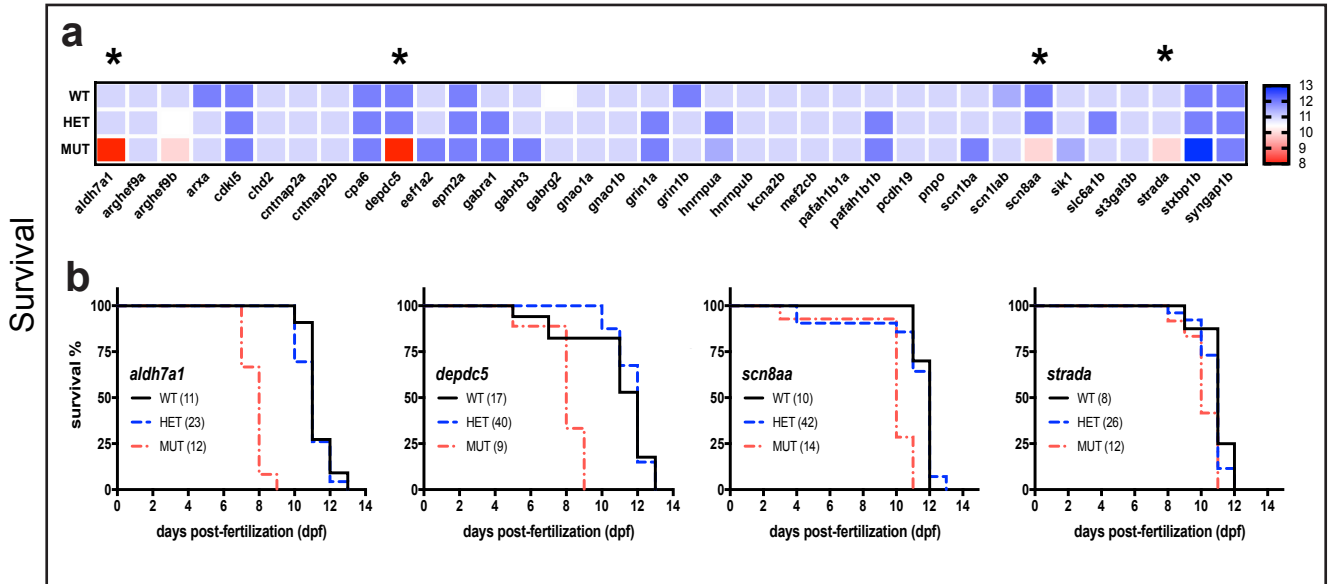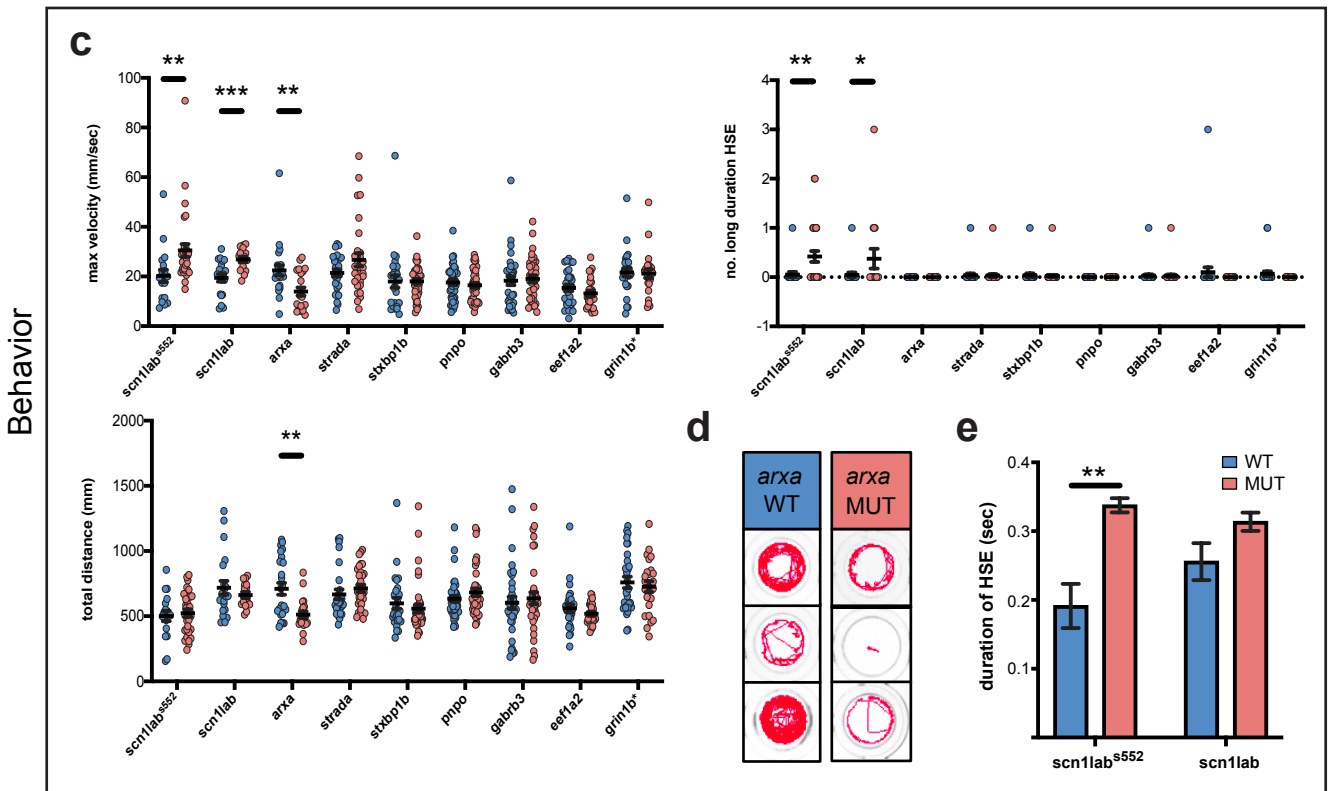

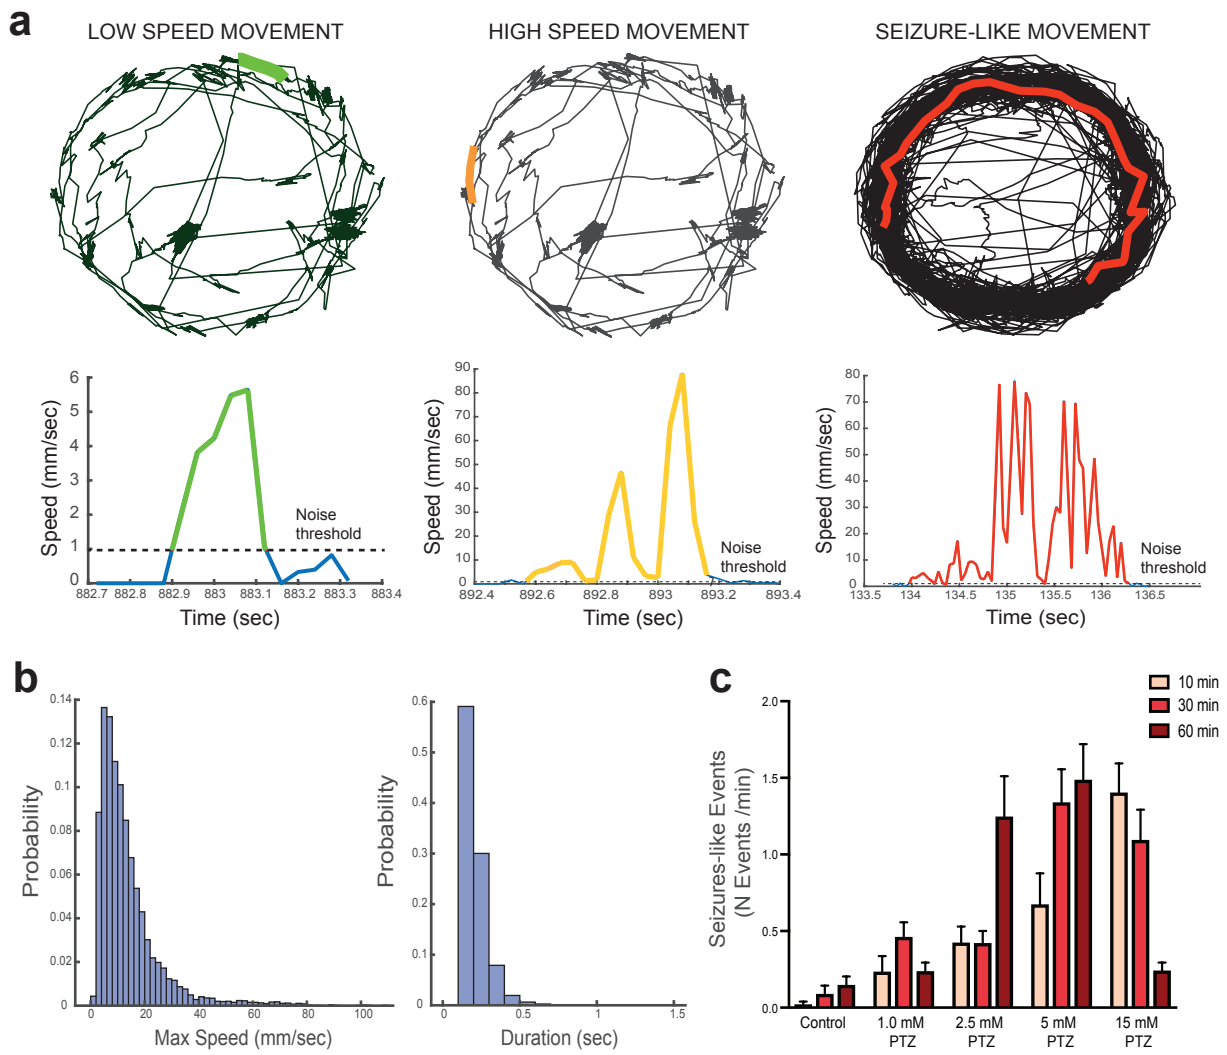

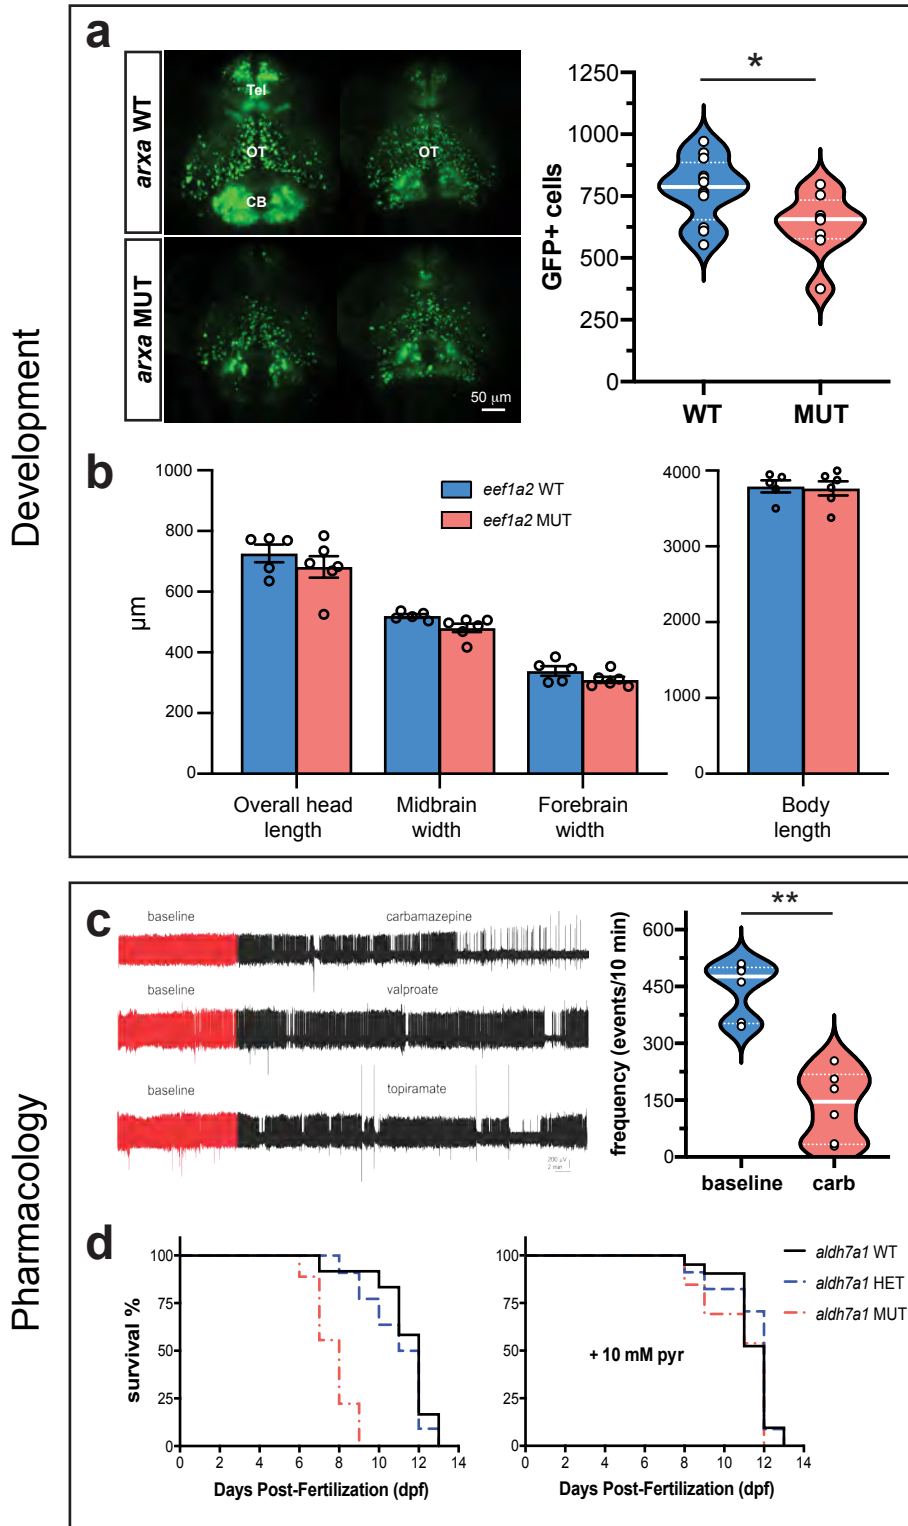

**Table S1: Genes associated with an epilepsy phenotype that were considered for the Epilepsy Zebrafish Project**

| Human Gene      | OMIM   | Phenotype                                                                     | Inheritance                               | Mechanism |
|-----------------|--------|-------------------------------------------------------------------------------|-------------------------------------------|-----------|
| <i>SCN1A</i>    | 182389 | Epileptic encephalopathy, early infantile (Dravet syndrome)                   | Autosomal dominant                        | LOF       |
| <i>SCN1B</i>    | 600235 | Atrial fibrillation, familial, 13                                             | Autosomal dominant                        | LOF       |
|                 |        | Brugada syndrome 5                                                            |                                           |           |
|                 |        | Cardiac conduction defect, nonspecific                                        |                                           |           |
|                 |        | Epilepsy, generalized, with febrile seizures plus, type 1                     |                                           |           |
|                 |        | Epileptic encephalopathy, early infantile, 52                                 | Autosomal dominant                        |           |
| <i>SCN8A</i>    | 600702 | Cognitive impairment with or without cerebellar ataxia                        | Autosomal dominant                        | LOF       |
|                 |        | Epileptic encephalopathy, early infantile, 13                                 | Autosomal dominant                        |           |
|                 |        | Seizures, benign familial infantile, 5                                        | Autosomal dominant                        |           |
| <i>SCN9A</i>    | 603415 | Epilepsy, generalized, with febrile seizures plus, type 7                     | Autosomal dominant                        | n/a       |
|                 |        | Erythralgia, primary                                                          | Autosomal dominant                        |           |
|                 |        | Febrile seizures, familial, 3B                                                | Autosomal dominant                        |           |
|                 |        | HSAN2D, autosomal recessive                                                   | Autosomal recessive                       |           |
|                 |        | Insensitivity to pain, congenital                                             | Autosomal recessive                       |           |
|                 |        | Paroxysmal extreme pain disorder,                                             | Autosomal dominant                        |           |
|                 |        | Small fiber neuropathy                                                        | Autosomal dominant                        |           |
|                 |        | {Dravet syndrome, modifier of}                                                |                                           |           |
| <i>KCNA2</i>    | 176262 | Epileptic encephalopathy, early infantile, 32                                 | Autosomal dominant                        | LOF       |
| <i>KCNMA1</i>   | 600150 | Cerebellar atrophy, developmental delay, and seizures                         | Autosomal dominant                        |           |
|                 |        | Paroxysmal nonkinesigenic dyskinesia, 3, with or without generalized epilepsy |                                           |           |
| <i>KCNQ3</i>    | 602232 | Seizures, benign neonatal, type 2                                             | Autosomal dominant                        |           |
| <i>KCTDI</i>    | 613420 | Scalp-ear-nipple syndrome                                                     | Autosomal dominant                        |           |
| <i>GABRA1</i>   | 137160 | Epileptic encephalopathy, early infantile                                     | Autosomal dominant                        | LOF       |
| <i>GABRB3</i>   | 137192 | Epileptic encephalopathy, early infantile, 43                                 | Autosomal dominant                        | LOF       |
|                 |        | {Epilepsy, childhood absence, susceptibility to, 5}                           |                                           |           |
| <i>GABRG2</i>   | 137164 | Epilepsy, generalized, with febrile seizures plus, type 3                     | Autosomal dominant                        | LOF       |
|                 |        | Febrile seizures, familial, 8                                                 |                                           |           |
|                 |        | {Epilepsy, childhood absence, susceptibility to, 2}                           |                                           |           |
| <i>GRIN1</i>    | 138249 | Mental retardation, autosomal dominant 8                                      | n/a                                       | n/a       |
| <i>GRIN2A</i>   | 138253 | Epilepsy, focal, with speech disorder and with or without mental retardation  | Autosomal dominant                        | LOF       |
| <i>SLC13A5</i>  | 608305 | Epileptic encephalopathy, early infantile, 25                                 | Autosomal recessive                       | LOF       |
| <i>SLC25A22</i> | 609302 | Epileptic encephalopathy, early infantile, 3                                  | Autosomal recessive                       | LOF       |
| <i>SLC2A1</i>   | 138140 | Dystonia 9                                                                    | Autosomal dominant                        | LOF       |
|                 |        | GLUT1 deficiency syndrome 1, infantile onset, severe                          | Autosomal recessive<br>Autosomal dominant |           |
|                 |        | GLUT1 deficiency syndrome 2, childhood onset                                  | Autosomal dominant                        |           |
|                 |        | Stomatin-deficient cryohydrocytosis with neurologic defects                   | Autosomal dominant                        |           |
|                 |        | {Epilepsy, idiopathic generalized, susceptibility to, 12}                     | Autosomal dominant                        |           |

|                 |        |                                                                                    |                                         |     |
|-----------------|--------|------------------------------------------------------------------------------------|-----------------------------------------|-----|
| <i>SLC35A2</i>  | 314375 | Congenital disorder of glycosylation, type II <sub>m</sub>                         | X-linked dominant;<br>Somatic mosaicism | LOF |
|                 |        | Epileptic encephalopathy, early infantile, 22                                      |                                         |     |
| <i>SLC6A1</i>   | 137165 | Myoclonic-atic epilepsy                                                            | Autosomal dominant                      | LOF |
| <i>DNMI</i>     | 602377 | Epileptic encephalopathy, early infantile, 31                                      | Autosomal dominant                      | LOF |
| <i>GOSR2</i>    | 604027 | Epilepsy, progressive myoclonic 6                                                  | Autosomal recessive                     | LOF |
| <i>PRRT2</i>    | 614386 | Convulsions, familial infantile, with paroxysmal choreoathetosis                   | Autosomal dominant                      | LOF |
|                 |        | Episodic kinesigenic dyskinesia 1                                                  | Autosomal dominant                      | LOF |
|                 |        | Seizures, benign familial infantile, 2                                             | Autosomal dominant                      | LOF |
| <i>SPTANI</i>   | 182810 | Epileptic encephalopathy, early infantile, 5                                       | Autosomal dominant                      |     |
| <i>STX1B</i>    | 601485 | Generalized epilepsy with febrile seizures plus, type 9                            | Autosomal dominant                      |     |
| <i>STXBPI</i>   | 602926 | Epileptic encephalopathy, early infantile, 4                                       | Autosomal dominant                      |     |
| <i>SYNI</i>     | 313440 | Epilepsy, X-linked, with variable learning disabilities and behavior disorders     | X-linked recessive; X-linked dominant   |     |
| <i>SYNGAP1</i>  | 603384 | Mental retardation, autosomal dominant 5                                           | Autosomal dominant                      |     |
| <i>ARX</i>      | 300382 | Epileptic encephalopathy, early infantile, 1                                       | X-linked recessive                      | LOF |
|                 |        | Hydranencephaly with abnormal genitalia                                            | X-linked                                |     |
|                 |        | Lissencephaly, X-linked 2                                                          | X-linked                                |     |
|                 |        | Mental retardation, X-linked 29 and others                                         | X-linked recessive                      |     |
|                 |        | Partington syndrome                                                                | X-linked recessive                      |     |
|                 |        | Proud syndrome                                                                     | X-linked                                |     |
| <i>EEF1A2</i>   | 602959 | Epileptic encephalopathy, early infantile, 33                                      | Autosomal dominant                      | n/a |
|                 |        | Mental retardation, autosomal dominant 38                                          |                                         |     |
| <i>HNRNPU</i>   | 602869 | Epileptic encephalopathy, early infantile                                          | Autosomal dominant                      | LOF |
| <i>MEF2C</i>    | 600662 | Mental retardation, stereotypic movements, epilepsy, and/or cerebral malformations | Autosomal dominant                      | LOF |
|                 |        | Chromosome 5q14.3 deletion syndrome                                                | Autosomal dominant                      |     |
| <i>PNKP</i>     | 605610 | Ataxia-oculomotor apraxia 4                                                        | Autosomal recessive                     | LOF |
|                 |        | Microcephaly, seizures, and developmental delay                                    | Autosomal recessive                     |     |
| <i>PRICKLE1</i> | 608500 | Epilepsy, progressive myoclonic 1B                                                 | Autosomal recessive                     | LOF |
| <i>SNIP1</i>    | 608241 | Psychomotor retardation, epilepsy, and craniofacial dysmorphism                    | Autosomal recessive                     | LOF |
| <i>CHD2</i>     | 602119 | Epileptic encephalopathy, childhood-onset                                          | Autosomal dominant                      | LOF |
| <i>ALDH7A1</i>  | 107323 | Epilepsy, pyridoxine-dependent                                                     | Autosomal recessive                     | LOF |
| <i>PNPO</i>     | 603287 | Pyridoxamine 5'-phosphate oxidase deficiency                                       | Autosomal recessive                     | LOF |
| <i>WWOX</i>     | 605131 | Epileptic encephalopathy, early infantile, 28                                      | Autosomal recessive                     | LOF |
|                 |        | Esophageal squamous cell carcinoma, somatic                                        |                                         |     |
|                 |        | Spinocerebellar ataxia, autosomal recessive 12                                     | Autosomal recessive                     |     |
| <i>ALG13</i>    | 300776 | Epileptic encephalopathy, early infantile, 36                                      | X-linked dominant                       | n/a |
|                 |        | Congenital disorder of glycosylation, type I <sub>s</sub>                          |                                         |     |
| <i>ASAHI</i>    | 613468 | Farber lipogranulomatosis                                                          | Autosomal recessive                     | LOF |
|                 |        | Spinal muscular atrophy with progressive myoclonic epilepsy                        | Autosomal recessive                     | LOF |
| <i>CLN8</i>     | 607837 | Ceroid lipofuscinosis, neuronal, 8                                                 | Autosomal recessive                     | n/a |
|                 |        | Ceroid lipofuscinosis, neuronal, 8, Northern epilepsy variant                      | Autosomal recessive                     |     |

|                 |        |                                                                       |                                            |     |
|-----------------|--------|-----------------------------------------------------------------------|--------------------------------------------|-----|
| <i>CDKL5</i>    | 300203 | Epileptic encephalopathy, early infantile, 2                          | X-linked dominant                          | LOF |
| <i>EPM2A</i>    | 607566 | Epilepsy, progressive myoclonic 2A (Lafora)                           | Autosomal recessive                        | LOF |
| <i>SIK1</i>     | 605705 | Epileptic encephalopathy, early infantile, 30                         | Autosomal dominant                         | n/a |
| <i>STRADA</i>   | 608626 | Polyhydramnios, megalencephaly, and symptomatic epilepsy              | Autosomal recessive                        | LOF |
| <i>ARHGEF9</i>  | 300429 | Epileptic encephalopathy, early infantile, 8                          | X-linked recessive                         | LOF |
| <i>DEPDC5</i>   | 614191 | Epilepsy, familial focal, with variable foci 1                        | Autosomal dominant                         | LOF |
| <i>GNAO1</i>    | 139311 | Epileptic encephalopathy, early infantile, 17                         | Autosomal dominant                         | n/a |
|                 |        | Neurodevelopmental disorder with involuntary movements                | Autosomal dominant                         |     |
| <i>PLCB1</i>    | 607120 | Epileptic encephalopathy, early infantile, 12                         | Autosomal recessive                        | LOF |
| <i>TBCID24</i>  | 613577 | Deafness, autosomal recessive 86                                      | Autosomal recessive                        |     |
|                 |        | Deafness, autosomal dominant 65                                       | Autosomal dominant                         |     |
|                 |        | DOOR syndrome                                                         | Autosomal recessive                        | LOF |
|                 |        | Epileptic encephalopathy, early infantile, 16                         | Autosomal recessive                        | LOF |
|                 |        | Myoclonic epilepsy, infantile, familial                               | Autosomal recessive                        |     |
| <i>CNTNAP2</i>  | 604569 | Cortical dysplasia-focal epilepsy syndrome                            | n/a                                        | LOF |
|                 |        | Pitt-Hopkins like syndrome 1                                          | n/a                                        |     |
|                 |        | {Autism susceptibility 15}                                            | n/a                                        |     |
| <i>LGII</i>     | 604619 | Epilepsy, familial temporal lobe, 1                                   | Autosomal dominant                         | LOF |
| <i>PCDH19</i>   | 300460 | Epileptic encephalopathy, early infantile, 9                          | X-linked                                   | LOF |
| <i>RELN</i>     | 600514 | Lissencephaly 2 (Norman-Roberts type)                                 | Autosomal recessive                        | LOF |
|                 |        | {Epilepsy, familial temporal lobe, 7}                                 | Autosomal dominant                         | LOF |
| <i>SRPX2</i>    | 300642 | (Rolandic epilepsy, mental retardation, and speech dyspraxia)         | n/a                                        | LOF |
| <i>SZT2</i>     | 615463 | Epileptic encephalopathy, early infantile, 18                         | Autosomal recessive                        | LOF |
| <i>PAFAH1B1</i> | 601545 | Lissencephaly                                                         | Isolated cases                             | LOF |
|                 |        | Subcortical laminar heterotopia                                       |                                            |     |
| <i>CPA6</i>     | 609562 | Epilepsy, familial temporal lobe, 5                                   | Autosomal dominant;<br>Autosomal recessive | LOF |
|                 |        | Febrile seizures, familial, 11                                        |                                            |     |
| <i>CSTB</i>     | 601145 | Epilepsy, progressive myoclonic 1A (Unverricht and Lundborg syndrome) | Autosomal recessive                        | LOF |
| <i>NHLRC1</i>   | 608072 | Epilepsy, progressive myoclonic 2B (Lafora)                           | Autosomal recessive                        | LOF |
| <i>SCARB2</i>   | 602257 | Epilepsy, progressive myoclonic 4, with or without renal failure      | Autosomal recessive                        | LOF |
| <i>ST3GAL5</i>  | 604402 | Salt and pepper developmental regression syndrome                     | Autosomal recessive                        | LOF |
| <i>ST3GAL3</i>  | 138140 | Autosomal Recessive Mental Retardation 12                             | Autosomal dominant                         | LOF |
|                 |        | Early Infantile Epileptic Encephalopathy 15                           |                                            |     |
| <i>KCNC1</i>    | 616187 | Epilepsy, progressive myoclonic 7                                     | Autosomal dominant                         | n/a |

**Table S2: The 40 genes targeted for the Epilepsy Zebrafish Project.**

| Human gene      | Zebrafish gene   | Protein Sequence Reference | % protein identity (GRCz10) | % DIOPT | Homology Score |
|-----------------|------------------|----------------------------|-----------------------------|---------|----------------|
| <i>ALDH7A1</i>  | <i>aldh7a1</i>   | ENSDARP00000108190         | 81                          | 75      | 78             |
| <i>ARHGEF9</i>  | <i>arhgef9a</i>  | ENSDARP00000118893         | 79                          | 100     | 90             |
|                 | <i>arhgef9b</i>  | ENSDARP00000115968         | 84                          | 75      | 80             |
| <i>ARX</i>      | <i>arxa</i>      | ENSDARP00000075256         | 68                          | 75      | 72             |
|                 | <i>arxb</i>      | not identified             |                             |         |                |
| <i>CDKL5</i>    | <i>cdkl5</i>     | ENSDARP00000111280         | 54                          | 92      | 73             |
| <i>CHD2</i>     | <i>chd2</i>      | ENSDARP00000108411         | 73                          | 67      | 70             |
| <i>CNTNAP2</i>  | <i>cntnap2a</i>  | (ENSDART00000178326.1)     | 71                          | 67      | 69             |
|                 | <i>cntnap2b</i>  | ENSDARP00000104097         | 65                          | 50      | 58             |
| <i>CPA6</i>     | <i>cpa6</i>      | ENSDARP00000096966         | 64                          | 83      | 74             |
| <i>DEPDC5</i>   | <i>depdc5</i>    | ENSDARP00000098526         | 75                          | 58      | 67             |
| <i>DNM1</i>     | <i>dnm1a</i>     | ENSDARP00000124266         | 89                          | 50      | 70             |
|                 | <i>dnm1b</i>     | ENSDARP00000088100         | 88                          | 75      | 82             |
| <i>EEF1A2</i>   | <i>eef1a2</i>    | ENSDARP0000010921          | 92                          | 92      | 92             |
| <i>EPM2A</i>    | <i>epm2a</i>     | ENSDARP00000132560         | 62                          | 42      | 52             |
| <i>GABRA1</i>   | <i>gabral</i>    | ENSDARP00000090772         | 84                          | 92      | 88             |
| <i>GABRB3</i>   | <i>gabbr3</i>    | ENSDARP00000081734         | 73                          | 83      | 78             |
| <i>GABRG2</i>   | <i>gabrg2</i>    | ENSDARP00000087253         | 83                          | 83      | 83             |
| <i>GNAO1</i>    | <i>gnao1a</i>    | ENSDARP00000124476         | 90                          | 92      | 91             |
|                 | <i>gnao1b</i>    | ENSDARP00000052345         | 84                          | 58      | 71             |
| <i>GOSR2</i>    | <i>gosr2</i>     | ENSDARP00000069524         | 69                          | 83      | 76             |
| <i>GRIN1</i>    | <i>grin1a</i>    | ENSDARP00000093144         | 88                          | 75      | 82             |
|                 | <i>grin1b</i>    | ENSDARP00000038151         | 88                          | 92      | 90             |
| <i>GRIN2A</i>   | <i>grin2aa</i>   | ENSDARP00000116766         | 67                          | 83      | 75             |
|                 | <i>grin2ab</i>   | not identified             |                             |         |                |
| <i>HNRNPU</i>   | <i>hnrnpua</i>   | ENSDARP00000144487         | 52                          | 75      | 64             |
|                 | <i>hnrnpub</i>   | ENSDARP00000112099         | 57                          | 83      | 70             |
| <i>KCNA2</i>    | <i>kcna2a</i>    | not identified             |                             |         |                |
|                 | <i>kcna2b</i>    | ENSDARP00000130579         | 92                          | 83      | 88             |
| <i>KCNMA1</i>   | <i>kcnma1a</i>   | ENSDARP00000118939         | 87                          | 67      | 77             |
| <i>MEF2C</i>    | <i>mef2ca</i>    | not identified             |                             |         |                |
|                 | <i>mef2cb</i>    | ENSDARP00000138296         | 74                          | 75      | 75             |
| <i>PAFAH1B1</i> | <i>pafah1b1a</i> | ENSDARP00000042217         | 94                          | 92      | 93             |
|                 | <i>pafah1b1b</i> | ENSDARP00000039257         | 93                          | 92      | 92             |
| <i>PCDH19</i>   | <i>pcdh19</i>    | ENSDARP00000124001         | 70                          | 67      | 68             |
| <i>PLCB1</i>    | <i>plcb1</i>     | not identified             |                             |         |                |
| <i>PNPO</i>     | <i>pnpo</i>      | ENSDARP00000011179         | 64                          | 75      | 70             |
| <i>PRICKLE1</i> | <i>prickle1a</i> | ENSDARP00000059513         | 69                          | 100     | 85             |



|                | <i>prickle1b</i> | not identified     |    |     |    |
|----------------|------------------|--------------------|----|-----|----|
| <i>SCN1B</i>   | <i>scn1ba</i>    | ENSDARP00000079066 | 36 | 100 | 68 |
| <i>SCN1A</i>   | <i>scn1laa</i>   | ENSDARP00000138437 | 67 | 67  | 67 |
|                | <i>scn1lab</i>   | ENSDARP00000125843 | 77 | 58  | 68 |
| <i>SCN8A</i>   | <i>scn8aa</i>    | ENSDARP00000024690 | 83 | 83  | 83 |
|                | <i>scn8ab</i>    | ENSDARP00000126281 | 84 | 75  | 80 |
| <i>SIK1</i>    | <i>sik1</i>      | ENSDARP00000077468 | 57 | 75  | 66 |
| <i>SLC2A1</i>  | <i>slc2a1a</i>   | ENSDARP00000022579 | 74 | 92  | 83 |
| <i>SLC6A1</i>  | <i>slc6a1a</i>   | ENSDARP00000119658 | 73 | 83  | 78 |
|                | <i>slc6a1b</i>   | ENSDARP00000005281 | 84 | 100 | 92 |
| <i>SPTAN1</i>  | <i>spna2</i>     | ENSDARP00000093027 | 90 | 83  | 87 |
| <i>ST3GAL3</i> | <i>st3gal3b</i>  | ENSDARP00000110277 | 63 | 100 | 82 |
| <i>STRADA</i>  | <i>strada</i>    | ENSDARP00000115217 | 70 | 67  | 68 |
| <i>STX1B</i>   | <i>stx1b</i>     | ENSDARP00000076389 | 97 | 100 | 99 |
| <i>STXBP1</i>  | <i>stxbp1a</i>   | ENSDARP00000012776 | 85 | 83  | 84 |
|                | <i>stxbp1b</i>   | ENSDARP00000026241 | 77 | 67  | 72 |
| <i>SYNGAP1</i> | <i>syngap1a</i>  | ENSDARP00000144044 | 63 | 75  | 69 |
|                | <i>syngap1b</i>  | ENSDARP00000087797 | 63 | 67  | 65 |
| <i>TBC1D24</i> | <i>tbc1d24</i>   | ENSDARP00000128484 | 55 | 83  | 69 |

**Table S3: Characterization of zebrafish orthologues for phenotypic characterization**

| Human   | Zebrafish       | Homology        | Brain Expression | Development     | Phenotypic Characterization |
|---------|-----------------|-----------------|------------------|-----------------|-----------------------------|
| SCN1A   | <i>scn1lab*</i> |                 |                  |                 | Y                           |
|         | <i>scn1laa</i>  |                 |                  |                 |                             |
| SCN8A   | <i>scn8aa</i>   | <i>scn8aa</i>   | <i>scn8aa</i>    | <i>scn8aa</i>   | Y                           |
|         | <i>scn8ab</i>   |                 |                  | <i>scn8ab</i>   |                             |
| GABRA1  | <i>gabra1</i>   | <i>gabra1</i>   | <i>gabra1</i>    | <i>gabra1</i>   | Y                           |
| GABRB3  | <i>gabbr3</i>   | <i>gabbr3</i>   | <i>gabbr3</i>    | <i>gabbr3</i>   | Y                           |
| GABRG2  | <i>gabrg2</i>   | <i>gabrg2</i>   | <i>gabrg2</i>    | <i>gabrg2</i>   | Y                           |
| GRIN2A  | <i>grin2aa</i>  | <i>grin2aa</i>  | <i>grin2aa</i>   | <i>grin2aa</i>  | No F3 generation            |
|         | <i>grin2ab</i>  |                 |                  |                 |                             |
| SLC2A1  | <i>slc2a1a</i>  | <i>slc2a1a</i>  | <i>slc2a1a</i>   | <i>slc2a1a</i>  | Y                           |
|         | <i>slc2a1b</i>  |                 |                  |                 |                             |
| SLC6A1  | <i>slc6a1a</i>  | <i>slc6a1a</i>  | <i>slc6a1a</i>   |                 | No Cutting                  |
|         | <i>slc6a1b</i>  | <i>slc6a1b</i>  | <i>slc6a1b</i>   | <i>slc6a1b</i>  | Y                           |
| DNM1    | <i>dnm1a</i>    | <i>dnm1a</i>    | <i>dnm1a</i>     | <i>dnm1a</i>    | No F3 generation            |
|         | <i>dnm1b</i>    |                 |                  |                 |                             |
| STXBP1  | <i>stxbp1a</i>  |                 |                  |                 |                             |
|         | <i>stxbp1b*</i> |                 |                  |                 | Y                           |
| SYNGAP1 | <i>syngap1a</i> | <i>syngap1a</i> | <i>syngap1a</i>  | <i>syngap1a</i> | No F3 generation            |
|         | <i>syngap1b</i> | <i>syngap1b</i> |                  | <i>syngap1b</i> | Y                           |
| ARX     | <i>arxa</i>     | <i>arxa</i>     | <i>arxa</i>      | <i>arxa</i>     | Y                           |
|         | <i>arxb</i>     |                 |                  |                 |                             |
| EEF1A2  | <i>eef1a2</i>   | <i>eef1a2</i>   | <i>eef1a2</i>    | <i>eef1a2</i>   | Y                           |
| HNRNPU  | <i>hnrnpua</i>  | <i>hnrnpua</i>  | <i>hnrnpua</i>   | <i>hnrnpua</i>  | Y                           |
|         | <i>hnrnpub</i>  | <i>hnrnpub</i>  | <i>hnrnpub</i>   | <i>hnrnpub</i>  | Y                           |
| MEF2C   | <i>mef2ca</i>   |                 |                  |                 |                             |
|         | <i>mef2cb</i>   | <i>mef2cb</i>   | <i>mef2cb</i>    | <i>mef2cb</i>   | Y                           |
| CHD2    | <i>chd2</i>     | <i>chd2</i>     | <i>chd2</i>      | <i>chd2</i>     | Y                           |
| ALDH7A1 | <i>aldh7a1</i>  | <i>aldh7a1</i>  | <i>aldh7a1</i>   | <i>aldh7a1</i>  | Y                           |
| PNPO    | <i>pnp0</i>     | <i>pnp0</i>     | <i>pnp0</i>      | <i>pnp0</i>     | Y                           |
| CDKL5   | <i>cdkl5</i>    | <i>cdkl5</i>    | <i>cdkl5</i>     | <i>cdkl5</i>    | Y                           |
| GNAO1   | <i>gnao1a</i>   | <i>gnao1a</i>   | <i>gnao1a</i>    | <i>gnao1a</i>   | Y                           |

|                 |                  |                  |                  |                  |                  |
|-----------------|------------------|------------------|------------------|------------------|------------------|
|                 | <i>gnao1b</i>    | <i>gnao1b</i>    | <i>gnao1b</i>    | <i>gnao1b</i>    | Y                |
| <i>TBC1D24</i>  | <i>tbc1d24</i>   | <i>tbc1d24</i>   | <i>tbc1d24</i>   | <i>tbc1d24</i>   | No F3 generation |
| <i>PCDH19</i>   | <i>pcdh19</i>    | <i>pcdh19</i>    | <i>pcdh19</i>    | <i>pcdh19</i>    | Y                |
| <i>PAFAH1B1</i> | <i>pafah1b1a</i> | <i>pafah1b1a</i> | <i>pafah1b1a</i> | <i>pafah1b1a</i> | Y                |
|                 | <i>pafah1b1b</i> | <i>pafah1b1b</i> | <i>pafah1b1b</i> | <i>pafah1b1b</i> | Y                |
| <i>KCNA2</i>    | <i>kcna2a</i>    |                  |                  |                  |                  |
|                 | <i>kcna2b</i>    | <i>kcna2b</i>    | <i>kcna2b</i>    | <i>kcna2b</i>    | Y                |
| <i>KCNMA1</i>   | <i>kcnma1a</i>   | <i>kcnma1a</i>   |                  |                  |                  |
| <i>PRICKLE1</i> | <i>prickle1a</i> | <i>prickle1a</i> |                  | <i>prickle1a</i> | No F3 generation |
|                 | <i>prickle1b</i> |                  |                  |                  |                  |
| <i>EPM2A</i>    | <i>epm2a</i>     | <i>epm2a</i>     | <i>epm2a</i>     | <i>epm2a</i>     | Y                |
| <i>SIK1</i>     | <i>sik1</i>      | <i>sik1</i>      | <i>sik1</i>      | <i>sik1</i>      | Y                |
| <i>ARHGEF9</i>  | <i>arhgef9a</i>  | <i>arhgef9a</i>  | <i>arhgef9a</i>  | <i>arhgef9a</i>  | Y                |
|                 | <i>arhgef9b</i>  | <i>arhgef9b</i>  | <i>arhgef9b</i>  | <i>arhgef9b</i>  | Y                |
| <i>CPA6</i>     | <i>cpa6</i>      | <i>cpa6</i>      | <i>cpa6</i>      | <i>cpa6</i>      | Y                |
| <i>STRADA</i>   | <i>strada</i>    | <i>strada</i>    | <i>strada</i>    | <i>strada</i>    | Y                |
| <i>SPTAN1</i>   | <i>spna2</i>     | <i>spna2</i>     |                  |                  |                  |
| <i>DEPDC5</i>   | <i>depdc5</i>    | <i>depdc5</i>    | <i>depdc5</i>    | <i>depdc5</i>    | Y                |
| <i>CNTNAP2</i>  | <i>cntnap2a</i>  | <i>cntnap2a</i>  | <i>cntnap2a</i>  | <i>cntnap2a</i>  | Y                |
|                 | <i>cntnap2b</i>  | <i>cntnap2b</i>  | <i>cntnap2b</i>  | <i>cntnap2b</i>  | Y                |
| <i>SCN1B</i>    | <i>scn1ba</i>    | <i>scn1ba</i>    | <i>scn1ba</i>    | <i>scn1ba</i>    | Y                |
|                 | <i>scn1bb</i>    |                  |                  |                  |                  |
| <i>ST3GAL3</i>  | <i>st3gal3b</i>  | <i>st3gal3b</i>  | <i>st3gal3b</i>  | <i>st3gal3b</i>  | Y                |
| <i>PLCB1</i>    | <i>plcb1</i>     | <i>plcb1</i>     | <i>plcb1</i>     | <i>plcb1</i>     | No Cutting       |
| <i>GOSR2</i>    | <i>gosr2</i>     | <i>gosr2</i>     | <i>gosr2</i>     | <i>gosr2</i>     | No F3 generation |
| <i>STX1B</i>    | <i>stx1b</i>     | <i>stx1b</i>     | <i>stx1b</i>     | <i>stx1b</i>     | No F3 generation |
| <i>GRIN1</i>    | <i>grin1a</i>    | <i>grin1a</i>    | <i>grin1a</i>    | <i>grin1a</i>    | Y                |
|                 | <i>grin1b</i>    | <i>grin1b</i>    | <i>grin1b</i>    | <i>grin1b</i>    | Y                |
| <b>Total:</b>   | <b>57</b>        | <b>48</b>        | <b>44</b>        | <b>46</b>        |                  |

\* indicate control genes with previously characterized seizure phenotypes.

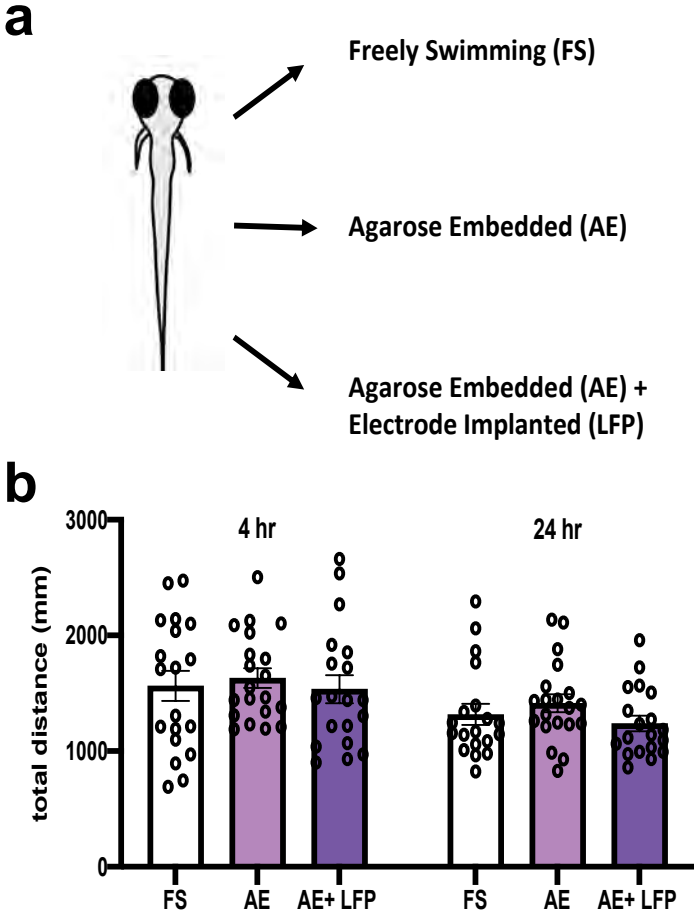

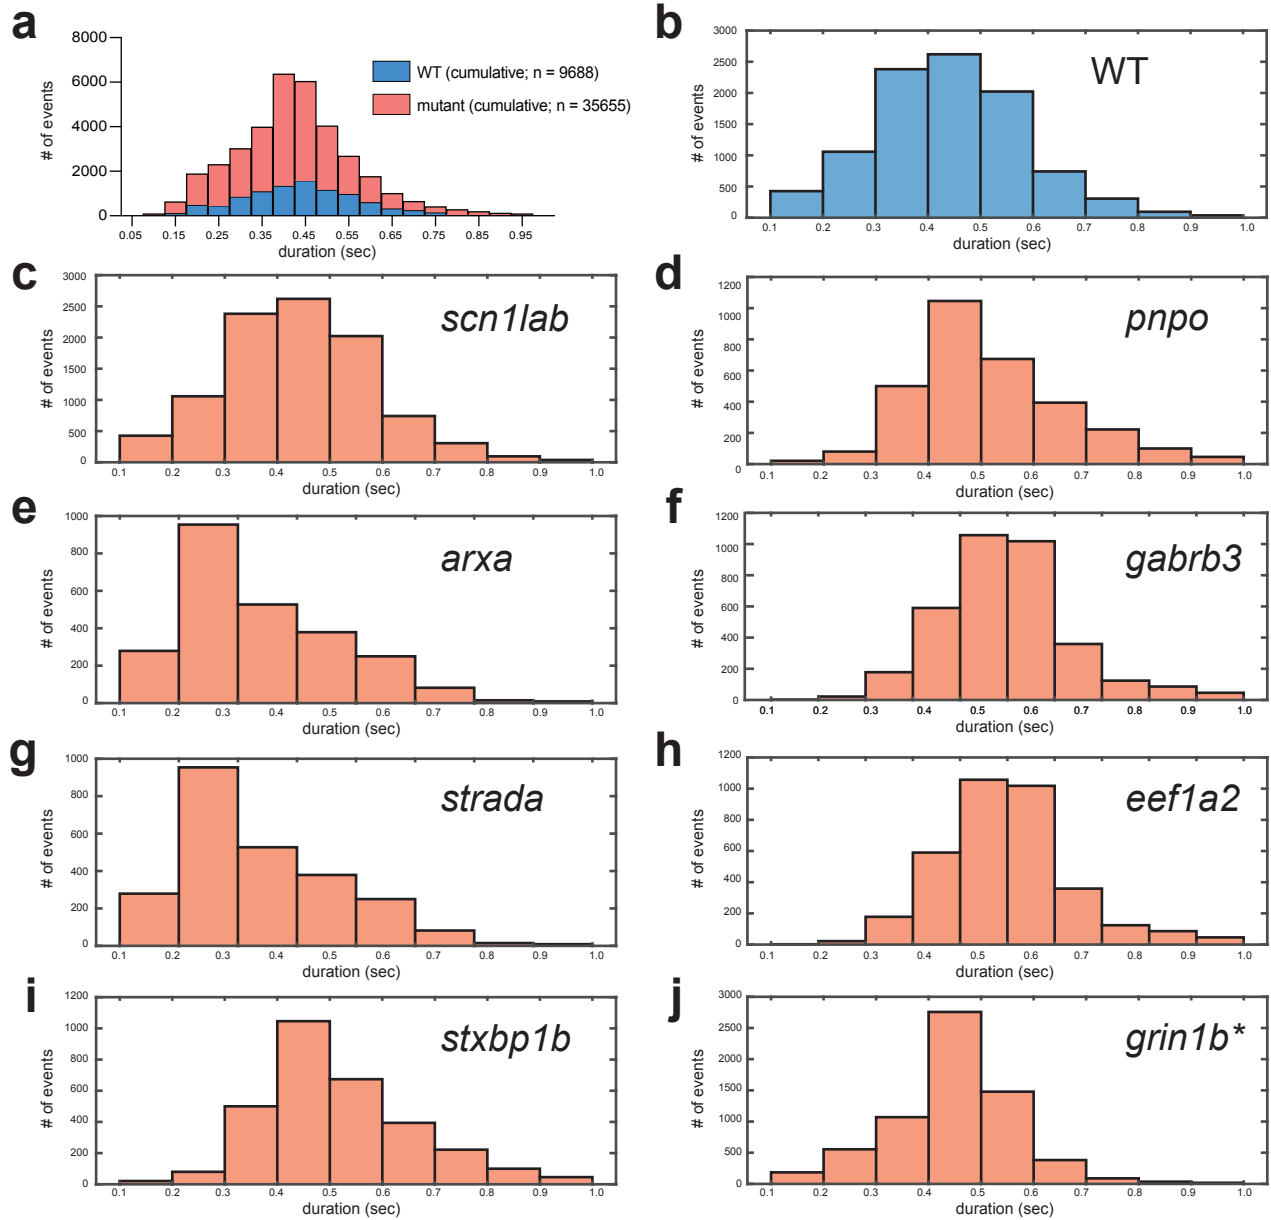

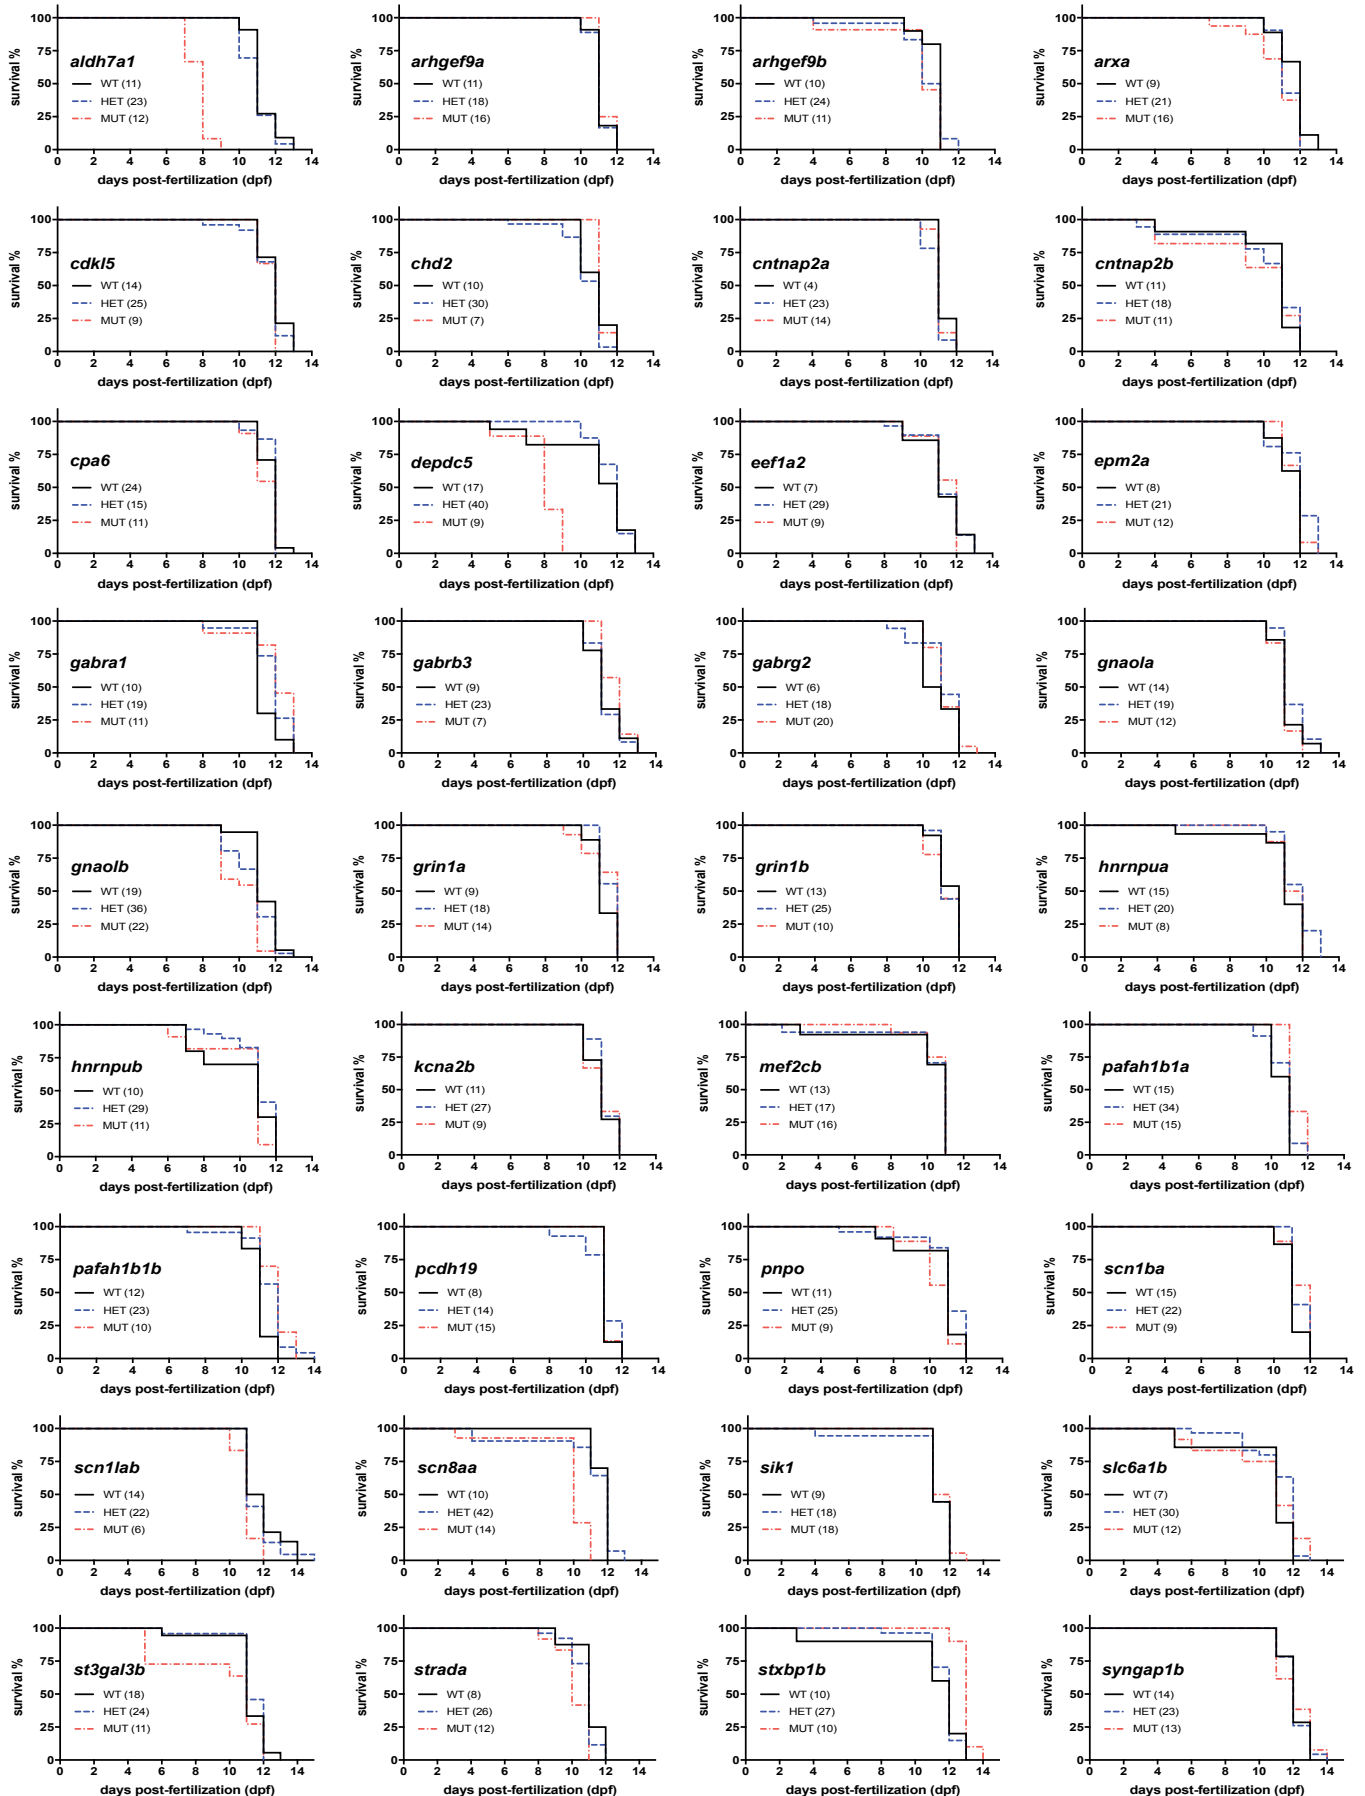

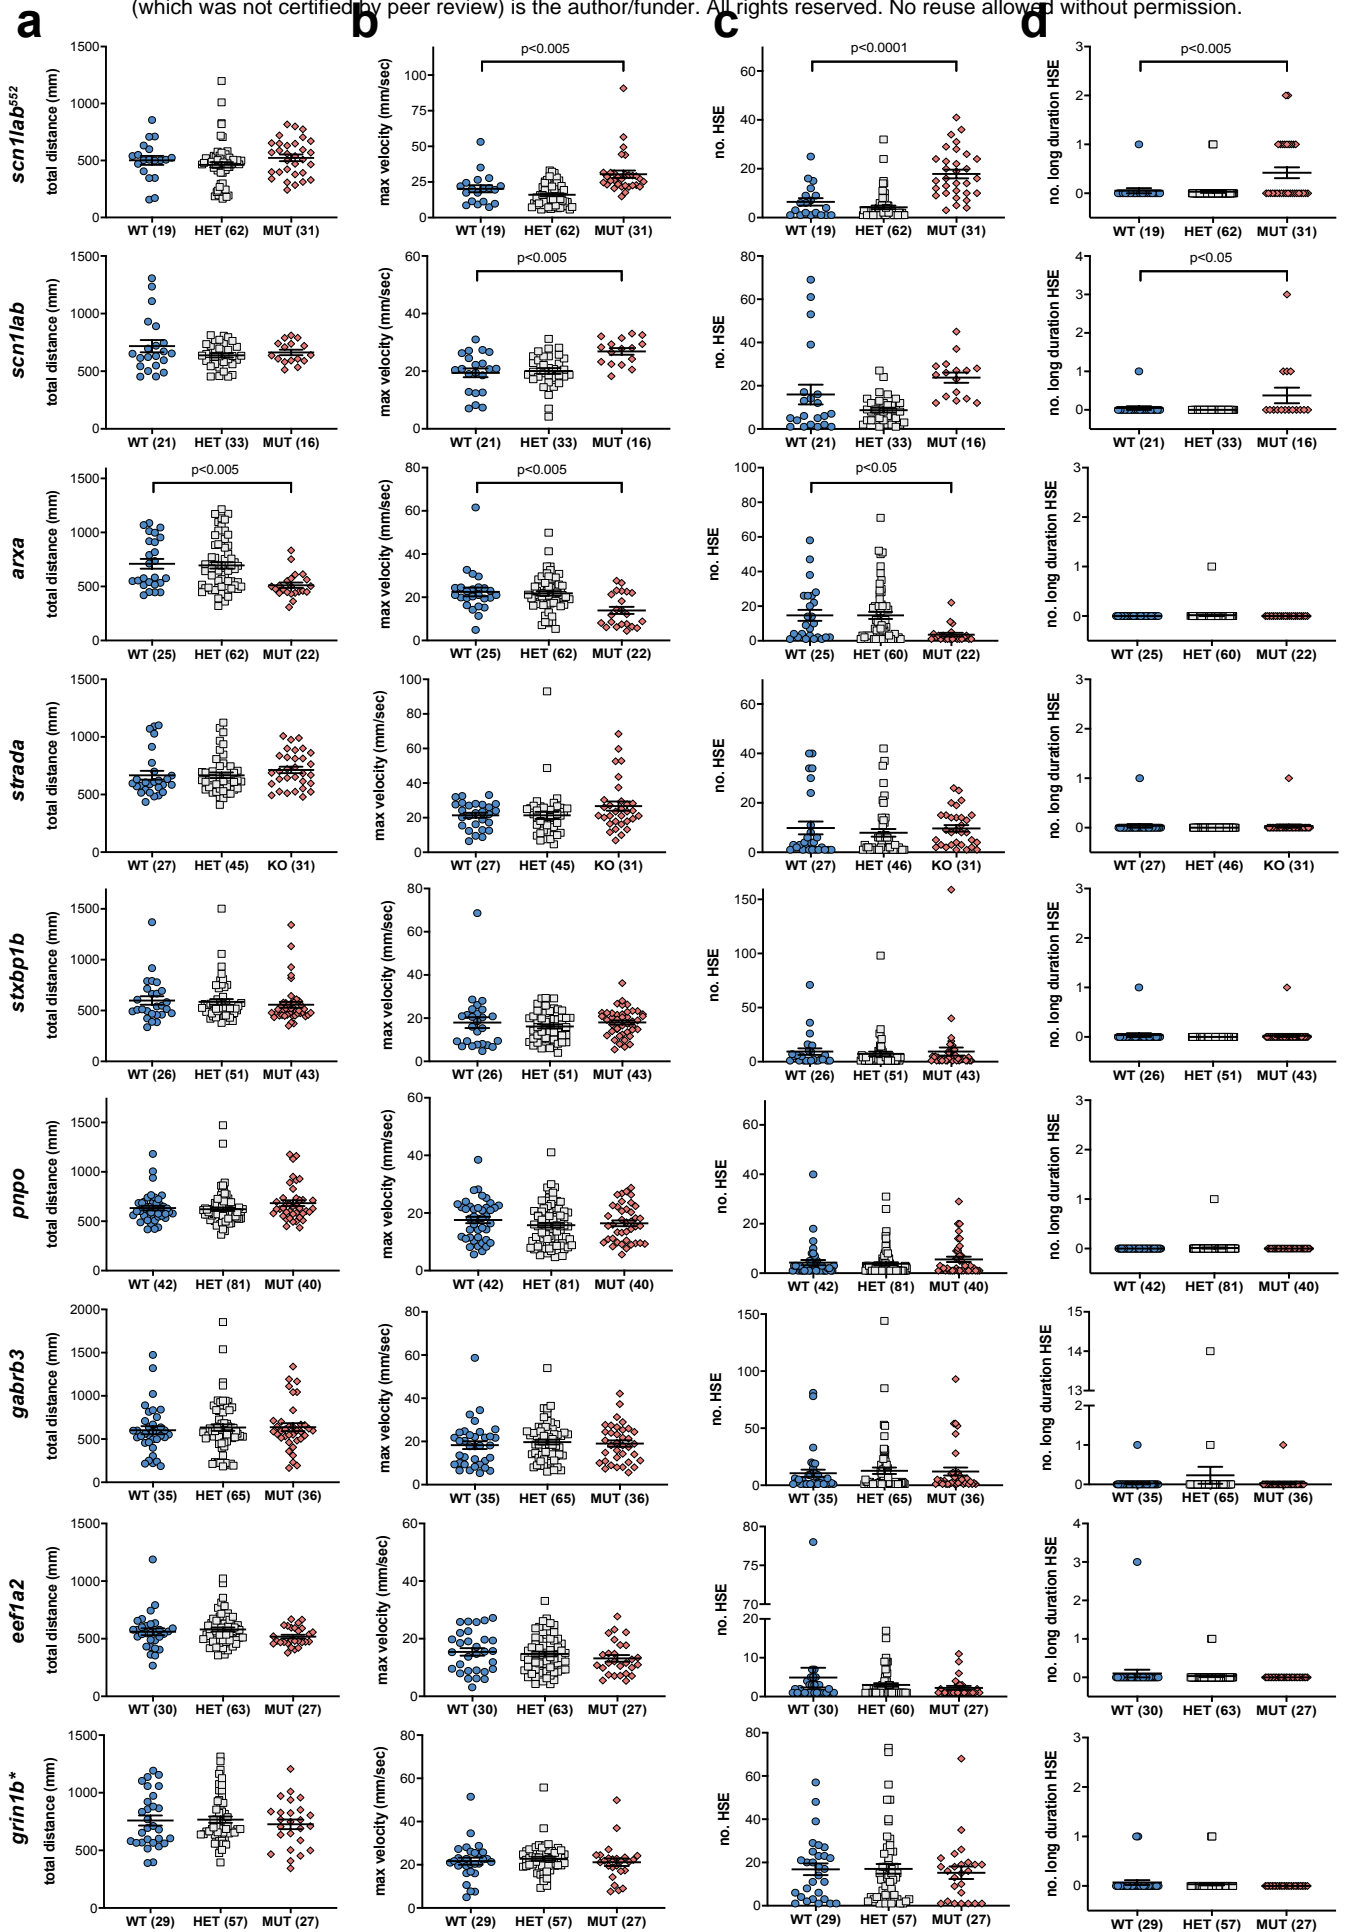

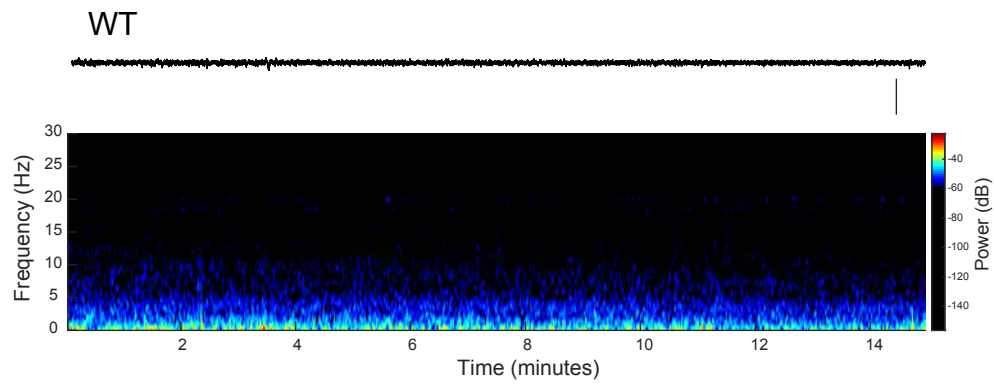

Source: https://biorxiv.org/content/10.1101/2021.02.11.430844v1.full.pdf
